1 **Genetic Associations in Four Decades of Multi-Environment Trials Reveal Agronomic Trait**

2 **Evolution in Common Bean**

3 Authors: Alice H. MacQueen\*, Jeffrey W. White†, Rian Lee‡, Juan M. Osorno‡, Jeremy

4 Schmutz§, Phillip N. Miklas\*\*, Jim Myers††, Phillip E. McClean‡, Thomas E. Juenger\*

5 \*The University of Texas at Austin, Austin, TX 78712 †USDA-ARS, US Arid-Land Agricultural

6 Research Center, Maricopa, AZ 85239 ‡Genomics and Bioinformatics Program, North Dakota

7 State University, Fargo, ND 58102 §Hudson-Alpha Institute for Biotechnology, Huntsville, AL

8 35806 \*\*USDA-ARS, Prosser, WA 99350 ††Department of Horticulture, Oregon State University,

9 Corvallis, OR 97331

10

11 Genotypic data is available on SRA under submission number SUB6162710.

12 Code for SNP calling is available at <https://github.com/Alice-MacQueen/SNP-calling-pipeline->

13 [GBS-ApeKI](#).

14 Aligned SNP data is available at <https://doi.org/10.18738/T8/RTBTIR>.

15 Raw phenotypic data is available in the National Agricultural Library:

16 <https://www.nal.usda.gov/>.

17 Code used to generate data used in this analysis from the raw phenotypic data is available at

18 Rpubs, found at: [http://rpubs.com/alice\\_macqueen/CDBN\\_Phenotype\\_Standardization](http://rpubs.com/alice_macqueen/CDBN_Phenotype_Standardization).

19 Code and data necessary to replicate this analysis are available as part of the R package

20 CDBNgenomics, found at: <https://github.com/Alice-MacQueen/CDBNgenomics>.

21 Supplementary data for this manuscript is available at: <https://doi.org/10.18738/T8/KZFZ6K>.

22 Running title: Breeding led to pleiotropy in the CDBN

23

24 Key words: multi-environment trial, genome-wide association, common bean (*Phaseolus*  
25 *vulgaris*), crop improvement, genetics of diversification

26

27 Author for correspondence:

28 *Alice MacQueen*

29 *2415 Speedway, Stop C0900, PAT 626*

30 *Austin, TX 78712-1208*

31 *Tel: +1 (512) 672-9467*

32 *Email: [alice.macqueen@utexas.edu](mailto:alice.macqueen@utexas.edu)*

33

34 **Abstract**

35 Multi-environment trials (METs) are widely used to assess the performance of promising  
36 crop germplasm. Though seldom designed to elucidate genetic mechanisms, MET datasets are  
37 often much larger than could be duplicated for genetic research and, given proper  
38 interpretation, may offer valuable insights into the genetics of adaptation across time and  
39 space. The Cooperative Dry Bean Nursery (CDBN) is a MET for common bean (*Phaseolus*  
40 *vulgaris*) grown for over 70 years in the United States and Canada, consisting of 20 to 50 entries  
41 each year at 10 to 20 locations. The CDBN provides a rich source of phenotypic data across  
42 entries, years, and locations that is amenable to genetic analysis. To study stable genetic effects  
43 segregating in this MET, we conducted genome-wide association (GWAS) using best linear  
44 unbiased predictions (BLUPs) derived across years and locations for 21 CDBN phenotypes and  
45 genotypic data (1.2M SNPs) for 327 CDBN genotypes. The value of this approach was confirmed  
46 by the discovery of three candidate genes and genomic regions previously identified in  
47 balanced GWAS. Multivariate adaptive shrinkage (mash) analysis, which increased our power to  
48 detect significant correlated effects, found significant effects for all phenotypes. The first use of  
49 mash on an agricultural dataset discovered two genomic regions with pleiotropic effects on  
50 multiple phenotypes, likely selected on in pursuit of a crop ideotype. Overall, our results  
51 demonstrate that by applying multiple statistical genomic approaches on data mined from MET  
52 phenotypic data sets, significant genetic effects that define genomic regions associated with  
53 crop improvement can be discovered.

54

## 55 **Introduction**

56           Almost every crop improvement program assesses the performance of promising  
57 germplasm and breeding material via multi-environment trials (METs). The phenotypic data  
58 produced by these trials are extremely important guides to growers, private seed companies,  
59 and public institutions involved in crop improvement, because combining trial data from  
60 multiple years and locations increases the probability of identifying genotypes that perform  
61 well or show especially desirable traits (BOWMAN 1998). Many cooperative testing networks  
62 conduct METs to enable cooperators and other interested parties to observe performance over  
63 a wider range of environments than if they were only tested locally (ANNICCHIARICO 2002). This  
64 supports the identification of advanced lines with stable, high performance in multiple  
65 production environments. Amongst many others, crop testing networks that conduct METs  
66 include the US cooperative regional performance testing program, the University Crop Testing  
67 Alliance, and the Cooperative Dry Bean Nursery (CDBN) (SINGH 2000).

68           Longstanding METs such as the CDBN have often focused on breeding for crop  
69 ideotypes, in addition to breeding to eliminate defects and to select for yield. DONALD (1968)  
70 defined a crop ideotype as an idealized plant with trait combinations expected to produce a  
71 greater yield quantity or quality. In contrast, approaches that eliminate defects or select for  
72 yield do not consider desirable combinations of traits; thus, these approaches only produce  
73 desirable combinations by chance. Selection for an ideotype involves selection for correlated  
74 traits, and could lead to substantial pleiotropy, where a single gene affects multiple traits. METs  
75 like the CDBN that were used to select for specific crop ideotypes could provide insight into the  
76 genetics of trait correlations in crop genomes.

77            Though METs are often used to measure genetic gain over time (GRAYBOSCH AND PETERSON  
78    2010; VANDEMARK *et al.* 2014), the vast majority of METs are designed to measure phenotypic  
79    responses to a broad set of targeted growing environments. The experimental designs of METs  
80    can pose substantial analytical challenges to additional, unplanned genetic analyses. METs  
81    typically produce sparse data matrices of phenotypes across germplasm entries, locations, and  
82    years (Fig. 1). The frequency of different germplasm entries may vary as part of the normal  
83    selection process. Thus, entries with good performance are often tested in more locations and  
84    years than those with poor performance. With the exception of few standard checks, the set of  
85    genotypes tested each year typically varies, with most genotypes tested in only one or two  
86    years. In addition, the total number of genotypes tested each year can vary substantially, and  
87    this number is typically too small for genome-wide association on any one year's data alone.  
88    Over the years, MET cooperators can also join or leave the network and add or drop MET sites  
89    or phenotypes due to changes in research focus, personnel, or funding. All of these variations  
90    make METs into large unbalanced datasets that need to be handled properly for genetic work.  
91    Genetic analyses of MET germplasm can also be hampered by the difficulty of obtaining and  
92    genotyping previously evaluated entries, particularly entries with poor trial performance that  
93    were not tested further. This difficulty may bias or prevent studies that require genetic diversity  
94    to explain phenotypic variation, such as genome-wide association studies. In contrast, field  
95    experiments designed for genetic studies assess complete, balanced designs, and produce data  
96    matrices of phenotypes across genotypes and environments with few or no missing cells.  
97    Ideally, the number of genotypes is identical across all environments, and a minimum of a few

98 hundred genotypes are tested in each environment. Each genotype is also tested an equivalent  
99 number of times across sites and years.

100 Despite these analytical issues, METs often produce decades of phenotypic data, which  
101 gives them substantial appeal for use in genetic analyses of phenotypic variation. Genetic  
102 analyses of MET datasets have recently been implemented in several crop species (HAMBLIN *et*  
103 *al.* 2010; RIFE *et al.* 2018; SUKUMARAN *et al.* 2018). Its nutritional and agronomic importance, long  
104 history of multi-environment trials (METs), and emerging genomic tools makes common bean  
105 an outstanding species in which to assess METs that might support the genetic analysis of  
106 phenotypic variation. Common bean is the most consumed plant protein source worldwide and  
107 is a particularly important source of protein in the developing world (FAOSTAT 2015). In North  
108 America, common bean improvement efforts remain mostly in the public sector, and over the  
109 past 70 years, the CDBN has been a major testing platform for these improvement efforts. The  
110 CDBN is the largest MET for common bean in the United States and Canada (MYERS 1988; SINGH  
111 2000) and CDBN cooperators have collected phenotypic data on over 150 traits for hundreds of  
112 advanced breeding lines and released cultivars (hereafter entries) of common bean at over 70  
113 locations (Fig. 1), which produced up to 18,000 recorded data points per trait (Fig. 2a). The  
114 traits are of economic and/or agronomic importance to bean producers, and include seed yield,  
115 growth habit, seed size, phenology, and disease responses, among others (Fig. 2a, S1).

116 More than 500 CDBN entries have been grown since the 1980's (Fig. 1). These entries  
117 include released cultivars and unreleased advanced breeding lines representing most bean  
118 types grown in North America. These represent at least thirteen market classes of common  
119 bean that group into three major races from two independent domestication events (MAMIDI *et*

120 *al.* 2011) (Fig. 1). Therefore, the CDBN can be used as a representative sample of the genetic  
121 diversity being used by North American bean breeders in their programs throughout the last 70  
122 years. However, phenotypic data from the CDBN is sparse and unevenly distributed: the  
123 average CDBN entry was grown at only 19 of the 70 locations and in two of the 34 years, with  
124 substantial variation in these numbers. CDBN cooperators grew between 16 and 61 of the 500+  
125 entries each year and used ten to 28 of the 70+ locations per year (Fig. 1). Individual CDBN  
126 locations grew between eight and 514 entries, with a median of 74 entries. Locations were used  
127 in the CDBN for as few as one to as many as 34 years, with a median of five years of  
128 participation. Though genotypes are present only intermittently over CDBN locations and years,  
129 the vast phenotyping effort on this interrelated set of bean germplasm, when combined with  
130 genomic data, offers an excellent opportunity to identify genomic regions affecting phenotypic  
131 variation in this species.

132           Genome-wide association studies (GWAS) have elucidated candidate genes and  
133 genomic regions that affect trait variation in many other crop species (ATWELL *et al.* 2010; KIRBY  
134 *et al.* 2010; MACKAY *et al.* 2012; LIN *et al.* 2014; MCCOUCH *et al.* 2016; MACARTHUR *et al.* 2017; XIAO  
135 *et al.* 2017; TOGNINALLI *et al.* 2018) and have recently been implemented in common bean (CICHY  
136 *et al.* 2015; KAMFWA *et al.* 2015b; KAMFWA *et al.* 2015a; MOGHADDAM *et al.* 2016; SOLTANI *et al.*  
137 2017; TOCK *et al.* 2017; NASCIMENTO *et al.* 2018; SOLTANI *et al.* 2018; OLADZAD *et al.* 2019a; OLADZAD  
138 *et al.* 2019b; RAGGI *et al.* 2019). Combining sparse phenotypic data in agricultural datasets to  
139 look for pleiotropic effects across conditions has parallels in human biomedical GWAS. In these  
140 trials, individual clinics can assess only a subset of human genotypes, and patients are  
141 evaluated using institution-specific criteria (LOTTA *et al.* 2017; VISSCHER *et al.* 2017). Human

142 GWAS often look for common variants for common diseases and correct phenotypes for effects  
143 of age, sex, and location (SCHORK *et al.* 2009; MEFFORD AND WITTE 2012; ZAITLEN *et al.* 2012).  
144 Analogously, we seek common, genetically stable variants for important phenotypes evaluated  
145 in a MET, corrected for effects of location, year, kinship, and assessment criteria. In human  
146 biomedical GWAS, pleiotropic effects of SNPs on multiple diseases have frequently been  
147 observed (SIVAKUMARAN *et al.* 2011). Selection for a common bean crop ideotype, with a long  
148 hypocotyl, many nodes carrying long pods and without side branches, small leaves, and  
149 determinate growth (ADAMS 1982; KELLY 2001), is known to have led to pleiotropic effects on  
150 multiple traits, such as seed yield, biomass, lodging, and plant height (SOLTANI *et al.* 2016). To  
151 study the genetic effects of this aspect of the CDBN selection framework, we used multivariate  
152 adaptive shrinkage (mash) to find genomic associations with significant effects on one or more  
153 CDBN phenotype (URBUT *et al.* 2019). Mash is a flexible, data-driven method that shares  
154 information on patterns of effect size and sign in any dataset where effects can be estimated on  
155 a condition-by-condition basis for many conditions (here, phenotypes) across many units (here,  
156 SNPs). It first learns patterns of covariance between SNPs and phenotypes from SNPs without  
157 strong effects, then combines these data-driven covariances with the original condition-by-  
158 condition results to produce improved effect estimates. In this way, mash shares information  
159 between conditions to increase the power to detect shared patterns of effects. Mash was  
160 originally used for analyses of human biomedical data (URBUT *et al.* 2019) and has yet to be used  
161 in an agricultural setting. This analysis method could be used with the rich phenotypic  
162 resources of crop METs to understand genetic effects across multiple phenotypes or across  
163 multiple locations and years.



164 Here, we demonstrate that the CDBN MET dataset can be used to make genetic  
165 discoveries, despite the sparse nature of the data, by using BLUPs for entries phenotyped in the  
166 CDBN. We explore whether this approach can find genomic regions significantly associated with  
167 phenotypic variation, and compare associations found with this approach to published GWAS  
168 results obtained from more balanced trials. We also explore patterns of genomic associations  
169 with significant effects on more than one CDBN phenotype using mash. Our results  
170 demonstrate the value of adding a genetic component to datasets such as the CDBN and  
171 provide a starting point for future work that explores the genetics of phenotypes evaluated in  
172 METs.

## 173 **Materials and Methods**

### 174 ***Background principles: processing, digitization and genetic analysis of phenotypic data***

175 MET datasets represent substantial phenotypic resources that can aid in the genetic  
176 study of important agronomic phenotypes. Several important steps in preparing the CDBN data  
177 for analysis fall under the remit of data science, and specifically involve the data processing  
178 steps outlined here. First, when available only from printed reports, the data was rendered  
179 machine-readable. Processing of the digitized data next involved cleaning the data to remove  
180 inconsistencies and spurious data, then filtering to retain only the relevant data. The data was  
181 stored in a consistent form where the semantics of the dataset matched the way it was stored.  
182 Then, various data scales for individual traits such as growth habit were standardized to create  
183 phenotypes that were more consistent across locations and years. The phenotypic data was  
184 next enriched with additional attributes that made subsequent analyses more meaningful, such

185 as germplasm, environment, and crop management information. Then, the data was  
186 aggregated to create summary data, by estimating BLUPs for each phenotype. We next used a  
187 GWAS modeling approach to determine the genomic regions associated with these data  
188 summaries. Finally, we used multivariate adaptive shrinkage (mash) to examine the patterns of  
189 overlap between genomic associations with significant effects on one or more phenotype  
190 (URBUT *et al.* 2019).

### 191 *Phenotypic data processing*

192 Phenotypic data for entries grown in the CDBN were available mainly as hard-copy  
193 reports providing plot averages at named locations. Some reports were available in the  
194 National Agricultural Library from the 1950s onwards; however, reports from 1981 onwards  
195 had substantial additional available genetic material and were the focus for this analysis (Table  
196 S1). Reports from 1981 to 2015 were scanned if not in digital format, digitized using optical  
197 image recognition as required, and then reformatted using custom SAS (SAS System, version  
198 9.4, SAS Institute Inc., Cary, NC) scripts that also standardized nomenclature and units of  
199 measurement.

200 Much of the phenotypic data required additional processing to allow comparisons  
201 across locations and years. The long timespan and large number of testing locations led to the  
202 scoring of 152 traits. Many of these traits represented distinct methods for scoring similar  
203 phenotypes; for example, lodging was scored on a percent scale, a 1 to 5 scale, a 0 to 9 scale,  
204 and a 1 to 9 scale at different locations and in different years; for this analysis, these lodging  
205 traits were standardized to one lodging phenotype on a 1 to 5 scale. From 152 traits reported,

206 22 phenotypes were standardized for use in GWAS, including eight quantitative phenotypes  
207 and fourteen qualitative phenotypes created from visual scores and/or specific measurements  
208 (Fig. 2a). The output from the R script used to standardize the phenotypes across locations and  
209 years can be found online at  
210 [http://rpubs.com/alice\\_macqueen/CDBN\\_Phenotype\\_Standardization](http://rpubs.com/alice_macqueen/CDBN_Phenotype_Standardization).

211 We generated phenotypes associated with location code, year, and genotype  
212 information. A total of 70 location codes were created as four-letter abbreviations with the U.S.  
213 state or Canadian province abbreviation as the first two letters, and the specific site  
214 abbreviation as the second two letters. Five location codes ending in “2” corresponded to a  
215 second trial grown at that location and year, usually with a treatment such as drought or  
216 disease applied. Location codes were associated with latitude, longitude, elevation, and other  
217 location-specific metadata (Table S2), while genotypes were associated with market class and  
218 race, as well as the availability of seed from the holdings of CDBN cooperators and single  
219 nucleotide polymorphism (SNP) data, where available (Table S2).

220 In general, location by year (L\*Y) combinations with outlier phenotypic values (values  
221 above the third quartile or below the first quartile by 1.5 times the interquartile range, or IQR)  
222 were removed for every entry in that L\*Y combination. Removing outlier L\*Y combinations  
223 prevented possible bias from linear models using a biased sample of datapoints for a L\*Y, while  
224 still removing points that, by IQR measures and by knowledge of reasonable ranges for  
225 common bean quantitative phenotypes, were likely due to mismeasurement or data entry  
226 errors. The specifics of phenotype standardization for all 22 phenotypes are given in the

227 Supplementary Note and the code is available on GitHub at [https://github.com/Alice-](https://github.com/Alice-MacQueen/CDBNgenomics/tree/master/analysis-paper)  
228 [MacQueen/CDBNgenomics/tree/master/analysis-paper](https://github.com/Alice-MacQueen/CDBNgenomics/tree/master/analysis-paper).

229 ***Germplasm: CDBN Diversity Panel and Single Nucleotide Polymorphism Dataset***

230 *Germplasm recovery and sequencing*

231 To detect genomic regions associated with phenotypic variation in a GWAS framework,  
232 it is particularly valuable to have a large amount of heritable phenotypic variation. Thus, it was  
233 equally important to include entries from the CDBN with poor seed yields or non-ideal  
234 phenotypic traits as high yielding, commercially released varieties. We thus went to  
235 considerable effort to obtain seed of unreleased, unarchived materials from the holdings of  
236 CDBN cooperators. Germplasm from the entries grown in the CDBN was obtained from multiple  
237 sources, including the International Center for Tropical Agriculture (CIAT), the National Plant  
238 Germplasm System (NPGS), and three common bean diversity panels, the Mesoamerican  
239 Diversity Panel (MDP) (MOGHADDAM *et al.* 2016), Durango Diversity Panel (DDP) (SOLTANI *et al.*  
240 2016), and Andean Diversity Panel (ADP) (CICHY *et al.* 2015). Seed was also obtained from  
241 holdings of CDBN cooperators, including Mark Brick (Colorado State University), Jim Kelly  
242 (Michigan State University), Phil McClean (North Dakota State University), Phil Miklas (USDA-  
243 ARS), James Myers (Oregon State University), Juan Osorno (North Dakota State University), and  
244 Tom Smith (University of Guelph).

245 The SNP dataset was created from this germplasm in two ways. First, raw sequence data  
246 was obtained from the ADP, DDP, and MDP (CICHY *et al.* 2015; MOGHADDAM *et al.* 2016) for CDBN  
247 entries and all parents of CDBN entries which had been sequenced as part of these panels. The

248 remainder of the CDBN was genotyped using identical methodology to these previous diversity  
249 panels, dual-enzyme genotyping-by-sequencing (SCHRÖDER *et al.* 2016). Unfortunately, 39 of the  
250 older, unreleased varieties would no longer germinate. For these varieties, we obtained DNA  
251 for sequencing by rehydrating sterilized seeds on wetted Whatman paper in petri plates for 2-3  
252 days, then dissecting the embryo from the seed and extracting DNA from the embryo. The DNA  
253 from the remaining entries was extracted from young trifoliates. The enzymes *MseI* and *TaqI*  
254 were used for digestion following the protocol from Schröder *et al.* (2016). SNPs were called  
255 from this raw sequence data using the pipeline found at [https://github.com/Alice-](https://github.com/Alice-MacQueen/SNP-calling-pipeline-GBS-ApeKI)  
256 [MacQueen/SNP-calling-pipeline-GBS-ApeKI](https://github.com/Alice-MacQueen/SNP-calling-pipeline-GBS-ApeKI). Briefly, cutadapt was used to trim adapters and  
257 barcodes (MARCEL 2011), sickle adaptive trimming was used to remove ends of reads with  
258 quality scores below 20 (JOSHI AND FASS 2011), bwa mem was used to align reads to V2.0 of the  
259 G19833 reference genome found at  
260 [https://phytozome.jgi.doe.gov/pz/portal.html#!info?alias=Org\\_Pvulgaris](https://phytozome.jgi.doe.gov/pz/portal.html#!info?alias=Org_Pvulgaris) (LI AND DURBIN 2010;  
261 SCHMUTZ *et al.* 2014), and NGSEP was used to call SNPs for the entire set of CDBN entries and all  
262 parents in the CDBN pedigrees (DUITAMA *et al.* 2014). SNPs were imputed using FILLIN in TASSEL.  
263 This resulted in the creation of a diversity panel of 327 entries with MET data in the CDBN,  
264 (Table S2) with aligned SNP data available on the UT Libraries data repository at doi: <to be  
265 obtained before publication; authors can provide for analysis replication purposes during  
266 review> for use in the CDBNgenomics R package at [https://github.com/Alice-](https://github.com/Alice-MacQueen/CDBNgenomics)  
267 [MacQueen/CDBNgenomics](https://github.com/Alice-MacQueen/CDBNgenomics).  
268 *Genome-wide association study*

269 To explore consistent genetic effects that could be compared to balanced genetic trials,  
270 analyses were performed on genetic BLUPs for each phenotype. BLUPs were calculated in the  
271 rrBLUP package in R, using a kinship matrix and treating location and the interaction between  
272 location and year as fixed effects. The R code to generate the BLUPs is available on GitHub at  
273 <https://github.com/Alice-MacQueen/CDBNgenomics/tree/master/analysis-paper>. The BLUPs  
274 are available in Table S2. For GWAS phenotypes, BLUPs were retained only for CDBN entries  
275 phenotyped at least one time in the CDBN. The kinship matrix was calculated using default  
276 methods in GAPIT. A total of 1,221,540 SNPs with a minor allele frequency greater than 5% in  
277 the CDBN diversity panel were identified and used for the CDBN GWAS. GWAS analyses were  
278 performed using compressed mixed linear models (ZHANG *et al.* 2010) implemented in GAPIT  
279 with the optimum level of compression (LIPKA *et al.* 2012). These models used a kinship matrix  
280 calculated within GAPIT to control for individual relatedness, and some number of principle  
281 components (PCs) to control for population structure. The optimum number of principle  
282 components (PCs) to control for population structure was determined using model selection in  
283 GAPIT, and by selecting the number of PCs that maximized the Bayesian Information Criterion  
284 (BIC). Typically, zero to two PCs were used (Table S3). The final Manhattan plots were created  
285 using the ggman R package. Plots of intersecting sets were created using the UpSetR package  
286 (LEX *et al.* 2014). Candidate genes within a 20kb interval centered on the peak SNP with p-  
287 values above a Benjamini-Hochberg false discovery rate (FDR) threshold of 0.1 were examined  
288 further.

289 *Comparison to published genome-wide associations in common bean*

290 Out of the 21 BLUPs estimated from CDBN phenotypes, a group of 13 also had published  
291 associations from GWAS on common bean. To compare the major associations in our study to  
292 those of published studies on balanced genetic trials, we collected the major associations  
293 reported in eleven published GWAS studies of common bean (CICHY *et al.* 2015; KAMFWA *et al.*  
294 2015b; KAMFWA *et al.* 2015a; MOGHADDAM *et al.* 2016; SOLTANI *et al.* 2017; TOCK *et al.* 2017;  
295 NASCIMENTO *et al.* 2018; SOLTANI *et al.* 2018; OLADZAD *et al.* 2019a; OLADZAD *et al.* 2019b; RAGGI *et*  
296 *al.* 2019). We compared these published associations to the associations for the top 10 SNPs for  
297 each of the 13 phenotypes in this study, thinned to one SNP per 20kb region. Unfortunately,  
298 these comparisons were likely very conservative, in that most of these publications used panels  
299 of common bean that were comprised of material from different gene pools than the CDBN,  
300 with the exception of the MDP and DDP (MOGHADDAM *et al.* 2016; SOLTANI *et al.* 2016; OLADZAD *et*  
301 *al.* 2019a; OLADZAD *et al.* 2019b). Both Andean and Middle-American gene pools have been  
302 observed to have different SNPs underlying domestication traits (SCHMUTZ *et al.* 2014). Eight of  
303 these publications used v1.0 of the *Phaseolus vulgaris* genome annotation, while our  
304 associations were mapped to v2.0. We used the genome browser located at  
305 <https://legumeinfo.org/genomes/gbrowse/phavu.G19833.gnm2> to convert associations  
306 between these two versions of the genome annotation. We then determined the number of  
307 overlapping associations meeting two criteria: first, those within 200kb of one another, and  
308 second, within 20kb of one another and with the same candidate gene. We determined these  
309 overlaps for the 80 associations from the eleven published GWAS to find an expected rate of  
310 overlap, then compared this to the rate of overlap between this study and the eleven balanced  
311 GWAS.

312 *Analysis of pleiotropy or linked effects on multiple phenotypes*

313           To increase our power to detect associations above a FDR, and to find genomic  
314 associations with significant effects on one or more CDBN phenotype, we used a two-step  
315 empirical Bayes procedure, mash, to estimate effects of ~45000 SNPs on 20 BLUPs determined  
316 from CDBN phenotypes (URBUT *et al.* 2019). Mash has been used to increase power to detect  
317 effects in analyses of human data, and while the methods are extensible to any dataset with  
318 many SNPs/markers and many phenotypes/conditions, it has not yet been used in an  
319 agricultural setting. Briefly, mash is a flexible, data-driven method that shares information on  
320 patterns of effect size and sign in any dataset where effects can be estimated on a condition-  
321 by-condition basis for many conditions (here, phenotypes) across many units (here, SNPs). It  
322 first learns patterns of covariance between SNPs and phenotypes from SNPs without strong  
323 effects, then combines these data-driven covariances with the original condition-by-condition  
324 results to produce improved effect estimates. In this way, mash shares information between  
325 conditions to increase the power to detect shared patterns of effects. Importantly, this method  
326 does not have restrictive assumptions about the patterns of effects between markers or  
327 conditions. In addition, estimates with little uncertainty are not adversely affected by the  
328 inclusion of estimates with high uncertainty. Thus, we included 20 phenotypes in the mash  
329 analysis, including twelve phenotypes with no signal above the Benjamini-Hochberg FDR  
330 threshold in individual GWAS. Two low-signal phenotypes related to bean common mosaic virus  
331 presence or absence were not included; inclusion of these phenotypes did not significantly alter  
332 the mash results (data not shown). The procedure we used to generate input matrices for mash  
333 is captured in the R package `gapit2mashr`, available at <https://github.com/Alice->



334 [MacQueen/gapit2mashr](#). Briefly, the effect of the alternate allele relative to the reference allele  
335 was determined for each SNP using GAPIT. To allow mash to converge effectively on effect  
336 estimates, the effects for each phenotype were standardized to fall between -1 and 1, with a  
337 mean of 0. Because mash does not accept NA values, when GAPIT calculated standard errors  
338 for 95% or fewer of the SNPs in the GWAS, we instead calculated standard errors for that  
339 phenotype using Hedges' G (HEDGES AND OLKIN 1985).

340 Data-driven covariance matrices were estimated using 45,000 randomly selected SNPs  
341 from the entire set of 1,221,540 SNPs. These matrices were then used on the top 4,000 SNPs  
342 for each of the 20 traits, as determined by  $p$ -value in the individual GWAS, which produced a  
343 matrix of strong effects for 45,000 SNPs. We then explored the patterns of significant effects in  
344 the mash output. We first determined which SNPs had evidence of significant phenotypic  
345 effects by determining SNPs with the largest Bayes factors. In this analysis, the Bayes factor was  
346 the ratio of the likelihood of one or more significant phenotypic effects at a SNP to the  
347 likelihood that the SNP had only null effects. Here, following KASS AND RAFTERY (1995), a Bayes  
348 factor of  $> 10^2$  is considered decisive evidence in favor of the hypothesis that a SNP has one or  
349 more significant phenotypic effect. We also compared the size of significant phenotypic effects,  
350 as determined by SNPs with a local false sign rate of 0.05 or less for one or more phenotype.  
351 The local false sign rate is analogous to a FDR, but is more conservative, in that it also reflects  
352 the uncertainty in the estimation of the sign of the effect (STEPHENS 2017).

353 *Data availability statement*

354 Genotypic data is available on SRA under submission number SUB6162710. Code for  
355 SNP calling is available at <https://github.com/Alice-MacQueen/SNP-calling-pipeline-GBS-ApeKI>.  
356 Aligned SNP data is available at <https://doi.org/10.18738/T8/RTBTIR>. Raw phenotypic data is  
357 available in the National Agricultural Library: <https://www.nal.usda.gov/>. Code used to  
358 generate data used in this analysis from the raw phenotypic data is available at Rpubs, found at:  
359 [http://rpubs.com/alice\\_macqueen/CDBN\\_Phenotype\\_Standardization](http://rpubs.com/alice_macqueen/CDBN_Phenotype_Standardization). Code and data  
360 necessary to replicate this analysis are available as part of the R package CDBNgenomics, found  
361 at: <https://github.com/Alice-MacQueen/CDBNgenomics>. Supplementary data for this  
362 manuscript is available at: <https://doi.org/10.18738/T8/KZFZ6K>.

## 363 **Results**

### 364 *Cooperative Dry Bean Nursery selection framework*

365 Selection and breeding strategies to generate new bean entries for the CDBN varied  
366 across years and among breeding programs. However, in general, new advanced lines were  
367 selected from either single, triple, or double crosses among advanced breeding material and  
368 released cultivars, which in most cases were already tested within the CDBN in previous years.  
369 These lines were bulked to increase seed supply, then field tested to ensure consistency of  
370 phenotypic responses in the advanced lines. Entries with favorable characteristics were often  
371 entered into the CDBN to be phenotyped in multiple environments. Consequently, most CDBN  
372 entries are members of a complex pedigree which has had novel, favorable alleles recombined  
373 or introgressed into it over time.

374           It is clear that the CDBN is not a randomly mating, homogeneous population, and the  
375 breeding and selection strategy in the CDBN likely impacts GWAS on this material in a number  
376 of ways. Presumably, breeders have increased the frequency of alleles that favorably affect  
377 phenotypes over time, which should aid in the detection of these genomic regions via GWAS.  
378 The multiple generations of inbreeding should reduce allelic heterogeneity, which should also  
379 aid GWAS. Indeed, we find few heterozygous regions in our SNP dataset, and few examples of  
380 multiallelic loci. By the same token, the frequent inbreeding may also increase the size of  
381 linkage disequilibrium (LD) blocks or cause spurious patterns of LD, which may cause non-  
382 syntenic associations and make candidate gene identification more difficult. In addition, the  
383 infrequent crosses between the gene pools from the two independent domestication events,  
384 and the assortative mating practiced as part of the breeding strategy, could lead to an inflated  
385 false positive rate and create correlations between previously uncorrelated traits (Li *et al.*  
386 2017).

### 387 *Phenotypic Correlations in the Cooperative Dry Bean Nursery*

388           The CDBN contains a wealth of data to study the genetics of phenotypes and phenotypic  
389 correlations (Fig. 1, Fig. 2a). We were able to obtain and genotype 327 germplasm entries from  
390 the 544+ entries present in the CDBN trials from 1981 to 2015, including 124 entries that were  
391 neither released commercially nor submitted to the National Plant Germplasm System (NPGS  
392 2017), and 39 entries whose seed would not germinate. Most of the remaining entries were  
393 grown in the CDBN before 1990 and had seed stocks that, for reasons of practicality, were no  
394 longer maintained by breeders (Fig. 1). GBS of the available genotypes generated 1.2M SNPs for  
395 analysis of stable effects in the CDBN.

396 BLUPs of phenotypes from the CDBN, conditioned on location, location by year, and the  
397 kinship matrix, are analogous to breeding values for the CDBN entries. These genetic values can  
398 be used to determine the narrow-sense heritability,  $h^2$ , potentially explainable by GWAS.  $h^2$   
399 varied between 6% and 73% in the 21 phenotypic BLUPs (Table 1). We then determined the  
400 correlations between the BLUPs of CDBN phenotypes, or the genetic correlations. Correlation  
401 coefficients between BLUPs of CDBN phenotypes varied between -0.75 and 0.81, and most  
402 phenotypes were significantly correlated (Figure S1). Two major groups of phenotypes were  
403 positively correlated: biomass, days to flowering, plant height, zinc deficiency score, days to  
404 maturity, blackroot presence/absence, and early vigor were in the first of these groups, and  
405 white mold damage score, growth habit, seed yield, harvest index, lodging, rust damage score,  
406 bean common mosaic virus damage score, and halo blight damage score were in the second of  
407 these groups. These two groups had negative phenotypic correlations with each other.

408 *Eight CDBN phenotypes have genetic associations above the false discovery rate*

409 We conducted GWAS on 21 phenotypes using best linear unbiased predictors (BLUPs)  
410 calculated using a kinship matrix, location, and an interaction between location and year as  
411 fixed effects. (for details, see the *Genome-wide association study* section in the Materials and  
412 Methods). To determine if any SNP frequencies had changed over the duration of the CDBN, we  
413 also conducted GWAS on the earliest year that each germplasm entry was present in the CDBN  
414 as a proxy for the age of the entry. This GWAS was analogous to an environmental GWAS that  
415 uses climatic variables associated with a genotype's location of origin (HANCOCK *et al.* 2011;  
416 MORRIS *et al.* 2013), though this GWAS is fitted to a variable correlated with the age of the  
417 genotype rather than with its location of origin.

418           Given the analytical issues surrounding the use of METs for unplanned genetic analyses,  
419 it was unclear whether GWAS on CDBN phenotypes would find significant associations, or if  
420 these associations would be reduced or eliminated by environmental noise or by experimental  
421 design biases. Thus, we determined if any GWAS on CDBN phenotypes had significant  
422 associations after a Benjamini-Hochberg FDR correction of 10%. With this criterion, significant  
423 associations were discovered for eight of the 21 phenotypes. More than 33 peaks had SNPs  
424 with  $p$ -values above the FDR, indicating the presence of 30 or more distinct, significant  
425 associations with these eight CDBN-derived phenotypes. Phenotypes with associations above  
426 the FDR generally had more datapoints in the CDBN (6500 vs 2400 datapoints, Wilcoxon rank  
427 sum test  $p = 0.018$ ; Fig. 2a). Phenotypes with associations above the FDR also had significantly  
428 higher narrow-sense heritabilities estimated from the phenotypic data ( $h^2$  of 40.5% vs 25%,  
429 Wilcoxon rank sum test  $p = 0.038$ , Table 1). We briefly discuss the associations above the FDR  
430 for these eight phenotypes in the order of most to fewest datapoints in the CDBN. In cases  
431 where there were multiple associations for a single phenotype, we discuss only the top  
432 associations by  $p$ -value.

433           Seed yield ( $\text{kg ha}^{-1}$ ) had one significant peak after FDR correction, on Pv01 at 42.2Mb  
434 (Fig. 2b, 2c, Table S4). This association was correlated with a difference in seed yield of 104 kg  
435  $\text{ha}^{-1}$  (Fig. 2f, Supplementary Table 4). Median seed yield in the CDBN for the Durango,  
436 Mesoamerican, and Nueva Granada races was 2803, 2443, and 2038  $\text{kg ha}^{-1}$ , respectively; thus,  
437 this genomic region accounts for changes in seed yield of 3.7-5.1%, or three to four years of  
438 improvement effort at historical rates of bean improvement (VANDEMARK *et al.* 2014). This  
439 association was 3.7kb upstream of the gene *Phvul.001G167200*, a gene that is highly expressed

440 in the shoot and root tips of common bean at the 2<sup>nd</sup> trifoliolate stage of development (O'ROURKE  
441 *et al.* 2014; DASH *et al.* 2016). The *A. thaliana* homolog of this gene, *VERNALIZATION*  
442 *INDEPENDENCE 5 (VIP5)*, affects flowering time by activating Flower Locus C (FLC), which is a  
443 repressor of flowering (OH *et al.* 2004).

444 Seed weight (mg) had associations on nine chromosomes that were significant after FDR  
445 (Fig. 2d, 2e); the strongest of these were on Pv02 (Fig. 2g), Pv03, Pv05, and Pv08, though each  
446 explained only 1-2% of the variation in seed weight (Table S4). Because seed weight correlates  
447 strongly with population structure in the three bean races and two bean gene pools, seven  
448 principal components were used to correct for population structure in this GWAS (Table S3).  
449 The association on Pv02 was 5kb upstream of gene model *Phvul.002G150600*, a *Sel1* repeat  
450 protein. *Sel1-like* repeat proteins are frequently involved in signal transduction pathways and in  
451 the assembly of macromolecular complexes (MITTL AND SCHNEIDER-BRACHERT 2007). The  
452 association on Pv03 was 10kb upstream of gene model *Phvul.003G039900*, a jasmonic acid  
453 carboxyl methyltransferase. The association on Pv05 was not within 20kb of any gene. The  
454 association on Pv08 fell in the coding sequence of *Phvul.008G290600*, a choline-phosphate  
455 cytidyltransferase highly expressed in many tissues, including roots and pods and seeds at the  
456 heart stage and stage 2, or seeds 3 – 4 and 8 – 10mm wide (O'ROURKE *et al.* 2014; DASH *et al.*  
457 2016).

458 Days to flowering had one significant peak after FDR, on Pv01 between 13.4 and 17.1  
459 Mb (Figure S2a, Table S4). It was correlated with a difference in flowering time of 2 to 3 days,  
460 depending on the population (Figure S3a). A candidate gene model hypothesized to affect days  
461 to flowering, *Phvul.001G087500*, is located at 13.76 Mb in the V2.0 annotation for *P. vulgaris*.

462 Gene model *Phvul.001G087500* is an ortholog of *KNUCKLES (KNU)*, a protein which is part of the  
463 *Polycomb repressive complex 2*, a complex that affects both flowering time and floral meristem  
464 development (DE LUCAS *et al.* 2016). *KNU* is activated in the transition to determinate floral  
465 meristem development and functions in a feedback loop that promotes determinate  
466 development (PAYNE *et al.* 2004; SUN *et al.* 2014).

467 Lodging score, where higher scores indicated more stem breakage near ground level,  
468 had associations on three chromosomes that were significant after FDR; one on Pv04 at 2.8 Mb,  
469 one on Pv05 at 0.4 Mb, and one on Pv07 at 34.5 Mb (Figure S2b, Table S4). In total, these three  
470 associations explained 8% of the variation in lodging (Supplementary Figure 4). The signal on  
471 Pv04 fell within gene model *Phvul.004G025600*; the *A. thaliana* homolog of this gene is involved  
472 in the biosynthesis of inositol pyrophosphate, a cellular signaling molecule involved in  
473 metabolism and energy sensing (DESAI *et al.* 2014). The signal on Pv05 fell within gene model  
474 *Phvul.005G005400*, a uridine diphosphate glycosyltransferase superfamily protein (DASH *et al.*  
475 2016). The strongest signal for lodging, explaining 3% of the variation, fell in the promoter  
476 region of gene model *Phvul.007G221800*, which is orthologous to *SUPPRESSOR OF AUXIN*  
477 *RESISTANCE 1 (SAR1)*. In *Arabidopsis thaliana*, *SAR1* increases plant height and internode  
478 distance and appears to affect stem thickness (CERNAC *et al.* 1997; PARRY *et al.* 2006).

479 Harvest index, or the ratio of seed yield weight to total above ground biomass, had one  
480 significant association on Pv03 at 2.1 Mb (Figure S2c, Table S4). The alternate allele was  
481 associated with an increase in harvest index of 1.5 – 3.5%, and associated to bean race (Figure  
482 S3b). This allele was 20 kb from gene model *Phvul.003G023000*, a cellulose synthase-like

483 protein highly expressed in green mature pods, whole roots, and leaf tissue at the 2<sup>nd</sup> trifoliolate  
484 leaf stage of development (O'ROURKE *et al.* 2014; DASH *et al.* 2016).

485 Growth habit encompasses both determinate and indeterminate types (I and II/III), as  
486 well as upright and prostrate indeterminate types (II and III). Growth habit had significant  
487 associations on every chromosome after FDR; the strongest four associations were on Pv01 at  
488 6.2 and 42.2 Mb, on Pv09 at 30.9 Mb, and Pv10 at 42.7 Mb (Figure S2d, Table S4). There are  
489 known to be multiple determinacy loci segregating in different gene pools of common bean  
490 (KWAK *et al.* 2012), which could complicate associations between growth habit and genomic  
491 regions in the CDBN panel. These four associations were associated with variation in  
492 determinacy in this panel; however, these four associations were not sufficient to explain all  
493 variation in determinacy, in that 13 genotypes had all alleles that were associated with  
494 determinacy, but were indeterminate, and one genotype had all alleles that were associated  
495 with indeterminacy, but was determinate (Figure S3c). The association at 6 Mb on Pv01 fell in  
496 the coding sequence of the gene model *Phvul.001G055600*, a RING-CH type zinc finger protein  
497 expressed highly in roots and in stem internodes above the cotyledon at the 2<sup>nd</sup> trifoliolate stage  
498 (O'ROURKE *et al.* 2014; DASH *et al.* 2016). The association at 42.2 Mb was 3.7 kb upstream of the  
499 gene VIP5; as noted above, this gene and genomic region were also candidate associations for  
500 seed yield (kg ha<sup>-1</sup>). The association on Pv09 was 5 kb upstream of model *Phvul.009G204100*  
501 that encodes a signal peptide peptidase A highly expressed in pods associated with stage 2  
502 seeds and in stem internodes above the cotyledon at the 2<sup>nd</sup> trifoliolate stage (O'ROURKE *et al.*  
503 2014; DASH *et al.* 2016). The association on Pv10 was 1 kb upstream of model  
504 *Phvul.010G146500*, a gene from an uncharacterized protein family highly expressed in roots,



505 pods with seeds at the heart stage, and stem internodes above the cotyledon at the 2<sup>nd</sup>  
506 trifoliate stage (O'ROURKE *et al.* 2014; DASH *et al.* 2016).

507 Bean rust (*Uromyces appendiculatus*) causes leaf and pod pustules and leads to losses in  
508 vigor and seed yield. Higher plant damage caused by rust was indicated by a higher rust score.  
509 Rust score had significant associations on ten chromosomes after FDR (Figure S2e, Table S4).  
510 However, the strongest association was located on Pv11 at 50.6 Mb and overlapped a major  
511 cluster of disease resistance genes containing the rust resistance genes *Ur-3*, *Ur-6*, *Ur-7*, and *Ur-*  
512 *11* (HURTADO-GONZALES *et al.* 2017). This signal fell just upstream of the gene model  
513 *Phvul.011G193100*, which maps in the interval suggested to contain the resistance gene *Ur-3*  
514 (HURTADO-GONZALES *et al.* 2017). The alternate allele was present in the early years of our CDBN  
515 data within Mesoamerican race, but was either absent or rare within the Durango race in the  
516 CDBN until 1988, when it appeared in the pinto Sierra and the great northern Starlight. The  
517 alternate allele was not widely distributed in the Durango race until the mid-1990's (Figure  
518 S3d).

519 Finally, the presence or absence of curly top virus, a virus characterized by plant  
520 stunting and deformation of leaves and fruit, had significant associations on seven  
521 chromosomes after FDR; however, the strongest associations were on Pv01, Pv05, Pv07, and  
522 Pv11 (Figure S2f, Table S4). The association on Pv01 was 0.5 kb upstream of gene model  
523 *Phvul.001221100*, recently identified as the photoperiod sensitivity locus *Ppd*, or  
524 *PHYTOCHROME A3* (WELLER *et al.* 2019). The association on Pv05 was within 20kb of gene model  
525 *Phvul.005G051400*, a VQ motif-containing protein highly expressed in leaf tissue. VQ motif-  
526 containing proteins are a class of plant-specific transcriptional regulators that regulate

527 photomorphogenesis and responses to biotic and abiotic stresses (JING AND LIN 2015). The  
528 association on Pv07 was 1kb upstream of gene model *Phvul.007G035300*, a pH-response  
529 regulator protein. The association on Pv11 was 20kb downstream of gene model  
530 *Phvul.011G142800*, a terpene synthase gene expressed in young trifoliates, flowers, and young  
531 pods (O'ROURKE *et al.* 2014; DASH *et al.* 2016). Terpenoids are a large class of secondary  
532 metabolite which have roles in plant defense against biotic and abiotic stresses (SINGH AND  
533 SHARMA 2015).

534 *Three CDBN genetic associations overlap genetic associations from balanced genetic field trials*

535         The presence of many associations above the FDR threshold supports using MET data  
536 for genetic analyses. However, the assortative mating employed purposefully by breeders of  
537 entries in the CDBN could potentially lead to a high rate of false positives (LI *et al.* 2017).  
538 Overall, it was unclear whether GWAS using phenotypes derived from sparse MET datasets  
539 would yield similar genetic associations as published, balanced field trials. Thus, we compared  
540 the top associations discovered here to associations from eleven published GWAS papers on  
541 common bean. This allowed us to compare association overlaps for 13 phenotypes, seven of  
542 which that had associations above the FDR, and gave 34 top associations from this study to  
543 compare to 80 published association regions. In addition to these GWAS associations, the bean  
544 rust resistance phenotype overlapped with a candidate rust resistance gene, *Ur-3*, one of the  
545 two genes pyramided early on in bean breeding to provide comprehensive rust resistance.

546         Three major associations from this study were within 20kb of, and had the same  
547 candidate gene as, top associations from published, balanced GWAS: days to flowering, on Pv01

548 at 13.7 Mb; growth habit, on Pv01 at 42.2 Mb; and lodging, on Pv07 at 34.2 Mb (Table 2).  
549 Interestingly, when considering all 114 associations, each of these three regions had significant  
550 effects for three phenotypes: lodging, growth habit, and days to flowering on Pv01 at 13.7Mb;  
551 growth habit, seed yield, and biomass on Pv01 at 42.2Mb; and plant height, lodging, and  
552 growth habit on Pv07 at 34.2Mb (Table 2). In this study, the top 10 SNPs for harvest index and  
553 days to maturity also had the same candidate gene on Pv03 at 36.8 Mb, the gene model  
554 *Phvul.003G153100*. *Phvul.003G153100* is an AP2-like ethylene-responsive transcription factor  
555 highly expressed in root tissue and nodules (O'ROURKE *et al.* 2014; DASH *et al.* 2016).

556 In comparisons involving only the eleven balanced studies, nine of 80 associations fell  
557 into three 20kb regions, while 15 of the 80 associations fell into six 200kb regions. When this  
558 study was added, seven additional associations fell into four 20kb regions, while twelve  
559 additional associations fell into 14 overlapping 200kb regions (Table 2). This study did not  
560 identify many new overlaps at the 20kb level, though it did find associations in all three 20kb  
561 overlapping regions found by comparing the eleven balanced studies alone. It did, however,  
562 find many new overlaps with previously published studies at the 200kb level, twice as many as  
563 expected given the rate of overlap in the eleven balanced studies (chi-squared  $p = 0.025$ ).  
564 However, as the balanced studies often did not conduct GWAS on similar phenotypes, our  
565 “expected” rate of overlap is likely to be biased. Thus, we consider the fact that this study  
566 found the same three 20kb regions that overlap in balanced GWAS comparisons to be stronger  
567 evidence than the large number of overlaps at the 200kb level that this panel can yield similar  
568 associations to balanced GWAS of common bean diversity panels.

569 *Extensive pleiotropy or linked effects within CDBN genetic associations*

570 We observed that numerous CDBN phenotypes had overlapping distributions of  
571 significantly associated SNPs. These overlaps could be due to pleiotropy – one genetic locus  
572 affecting multiple phenotypes – or due to multiple tightly linked genetic loci affecting multiple  
573 phenotypes. To formally compare these overlaps, we used mash on 19 sets of 4,000 SNPs with  
574 the smallest  $p$ -values for phenotypes from the CDBN as well as 4,000 SNPs for the earliest year  
575 an entry was grown in the CDBN (Figure 3). Mash shares information about effect sizes of SNPs  
576 across all phenotypes, while accounting for data-driven covariances in the patterns of effects  
577 (URBUT *et al.* 2019). In contrast to phenotype-by-phenotype analyses, where only eight  
578 phenotypes had associations above the FDR, in mash, all twenty phenotypes had SNPs with  $p$ -  
579 values below the local false sign rate, an analog for the FDR. In addition, SNPs typically had local  
580 false sign rates below this threshold for 11-14 phenotypes; thus, there was either extensive  
581 pleiotropy or frequent linked effects on multiple phenotypes within entries in the CDBN. SNPs  
582 with Bayes factors above  $\sim 10^2$ , indicative of decisive evidence favoring that SNP having a  
583 significant effect on one or more phenotypes, were distributed very unevenly across the  
584 genome, with the vast majority of SNPs clustering within two large regions on Pv01 (Fig. 3b,  
585 Table S5). Interestingly, the two largest Bayes factors across all 20 phenotypes were within  
586 these two regions, on Pv01 at positions 15.4 Mb and 42.2 Mb. These associations were two that  
587 overlapped with top associations from published, balanced GWAS (Table 2). Outside of  
588 chromosome Pv01, the most significant Bayes factor was found for a SNP on Pv07 at 14.5 Mb.  
589 This SNP was not within 100 kb of any annotated gene.

590 The alternate allele for the SNP on Pv01 at 15.4 Mb was associated with significant  
591 decreases in biomass, days to flowering, days to maturity, plant height, and seed appearance

592 score. It was also associated with increases in CBB damage score, harvest index, root rot  
593 damage score, rust damage score, seed fill duration, white mold damage score, and zinc  
594 deficiency damage score (Figure 3d). Here, higher damage scores indicate increased levels of  
595 damage. The alternate allele for the SNP on Pv01 at 42.2 Mb was associated with significant  
596 decreases in biomass, days to flowering, growth habit (as an increased tendency towards  
597 determinacy), harvest index, lodging score, plant height, and seed yield, and increases in root  
598 rot damage score (Figure 3e). The allele was also significantly associated with earlier 'earliest  
599 year in the CDBN', indicating that this allele has been declining in frequency in entries in the  
600 CDBN over time. The alternate allele for the SNP on Pv07 at 14.5 Mb was associated with  
601 significant decreases in biomass, days to flowering, plant height, and seed appearance score  
602 (Figure 3f). Overall, two groups of phenotypes had consistent patterns of effect sign and effect  
603 magnitude for most significant SNPs (Fig. 3c). Days to maturity, growth habit, seed yield, days to  
604 flowering, biomass, and plant height had a large fraction of SNPs with significant effects with  
605 similar effects on these phenotypes; in most pairwise comparisons of these six traits, 40 – 90%  
606 of SNPs had the same sign and similar magnitudes of effect (Fig. 3c). The same was true for  
607 seed fill duration, white mold damage score, zinc deficiency damage score, harvest index, CBB  
608 damage score, and rust damage score; in pairwise comparisons of these six traits, 25 – 80% of  
609 SNPs had the same sign and similar magnitudes of effect (Fig. 3c). The phenotypes in the first  
610 group corresponded to plant architecture and size, while several phenotypes in the second  
611 group were related to disease response. Few other SNPs (~<10%) affected these two clusters of  
612 phenotypes in a similar magnitude with the same sign. Interestingly, groups of highly positively  
613 correlated phenotypic BLUPs, or genetic values, did not consistently match groups with large

614 fractions of SNP effects of the same sign and similar magnitude (Figure S4). 90% SNPs with  
615 Bayes factors above  $10^2$  affected 10 or more phenotypes (Table S5), and typically affected  
616 phenotypes in the two groups in similar ways; however, a few exceptions included Pv03 at  
617 10.64 Mb, which affected only plant height; Pv04 at 17.77 Mb, which affected seed weight and  
618 varied with earliest year in the CDBN; Pv07 at 13.94 Mb, which affected biomass; and Pv08 at  
619 33.18 Mb, which affected days to flowering, plant height, and seed appearance.

## 620 **Discussion**

621         The genes and genomic regions affecting phenotypic variation in common bean are now  
622 being narrowed down with the aid of a recently released high-quality reference genome  
623 (SCHMUTZ *et al.* 2014). Using previously generated phenotypic data for genetic analysis could  
624 circumvent the “phenotypic bottleneck” that has previously constrained our understanding of  
625 the genotype-phenotype map in this species. The CDBN offers a vast phenotypic data resource  
626 for common bean; however, it was unclear whether the sparse phenotypic data matrix from  
627 the CDBN, where only 20 to 30 entries were tested in each location and year, could be used for  
628 GWAS. Our results provide evidence supporting the use of METs such as the CDBN for genetic  
629 analysis. First, eight of the 22 phenotypes created using the CDBN data had associations that  
630 fell above the Bonferroni-Hochberg FDR threshold, and five of these phenotypes had multiple  
631 independent peaks that fell above this threshold. Given our FDR of 10%, there were at least 30  
632 distinct, significant associations with these CDBN-derived BLUPs for phenotypes, and these  
633 associations tended to be found in phenotypes with higher narrow-sense heritabilities.  
634 However, it is still surprising that only eight of the 22 phenotypes had significant associations by  
635 the FDR criterion.

636           We hypothesized that noise caused by environmental variation in phenotypes across  
637 years and locations reduced our ability to find significant associations in a condition-by-  
638 condition analysis. Supporting this hypothesis, we found that phenotypes with more datapoints  
639 in the CDBN were more likely to have associations above the FDR. Thus, we used mash to  
640 increase our power to detect significant effects for 20 of these phenotypes, and used an  
641 analogue of the FDR, the local false sign rate, to determine whether an effect was significant. By  
642 combining information about phenotypic effects across correlated phenotypes, we found  
643 significant associations for all phenotypes included in the mash analysis. Thus, phenotypes  
644 derived from CDBN MET data are suitable for analysis using GWAS, and the additional  
645 phenotypic data available in this MET can be analyzed in mash to boost the power to detect  
646 significant genetic effects for traits with pleiotropic genetic architectures.

647           Second, associations found in our GWAS coincided with results of previous GWAS using  
648 balanced phenotypic datasets. Three associations from this study overlapped top associations  
649 from published, balanced GWAS: Pv01 at 13.7 Mb, Pv01 at 42.2 Mb, and Pv07 at 34.2 Mb (Table  
650 2). The association at 13.7 Mb fell near the candidate gene *KNU*, a gene which is activated in,  
651 and later promotes, the transition to determinate floral meristem development. This peak falls  
652 within an association for days to flowering observed previously (MOGHADDAM *et al.* 2016). The  
653 association at 42.2 Mb fell near the candidate gene *VIP5*, an important regulator of flowering  
654 time in *A. thaliana* and other species (HUANG *et al.* 2012). Other mapping studies have also co-  
655 located *VIP5* with QTL for flowering time (ZHOU *et al.* 2014). The association at 34.2 Mb on Pv07  
656 also overlapped the strongest association for the earliest year each entry was grown in the  
657 CDBN, a proxy for the age of the CDBN entry. This association fell near the candidate gene

658 *SAR1*, which increases plant height and internode distance in *A. thaliana* (CERNAC *et al.* 1997;  
659 PARRY AND ESTELLE 2006). The alternate allele for the signal on Pv07 occurred in newer CDBN  
660 entries.

661 Third, our results are consistent with the recent history of breeding efforts in common  
662 beans and provide a map of the genomic regions that have been associated with improvement  
663 in the species. We find two major genomic regions on Pv01 associated with many CDBN  
664 phenotypes (Figure 3b), which we suggest were major targets of selection by breeders for  
665 entries that match an 'ideotype' for common bean. The original ideotype had a long hypocotyl,  
666 many nodes carrying long pods and without side branches, small leaves, and determinate  
667 growth (ADAMS 1982; KELLY 2001). The primary plant architecture change introduced into  
668 genotypes tested in the CDBN over the past 30 years was the adoption of upright indeterminate  
669 architecture (Type II), which replaced upright determinate (Type I) architecture in the  
670 Mesoamerican race and was introduced into prostrate indeterminate (Type III) germplasm  
671 (KELLY 2001; SOLTANI *et al.* 2016). Generally, entries with Type II architecture yielded more than  
672 determinate (Type I) entries, due to the increased pod set associated with indeterminate  
673 growth (KELLY 2001), and could yield more than Type III entries under grower-preferred direct  
674 harvest (ECKERT *et al.* 2011). An association for growth habit on Pv01 at 42.2 Mb fell near the  
675 gene *VIP5*; this SNP and gene were also candidate associations for seed yield in this study and  
676 days to flowering in MOGHADDAM *et al.* (2016). The Pv01, Pv09, and Pv10 associations for growth  
677 habit, specifically, variation in determinacy, segregate in different genotypes, consistent with  
678 the known multiple origins of determinacy segregating in this species (Figure S3c). However,  
679 these associations were not sufficient to explain all variation in determinacy present in this



680 panel, perhaps due to the relative rarity of some variants controlling determinacy within the  
681 CDBN panel.

682 Bean breeders in North American generally avoided modifying days to flowering over  
683 the years of the CDBN, to protect matching of phenology to specific production environments.  
684 However, when Type II architecture was introduced from Mesoamerica race into the  
685 Durango/Jalisco race, the first entries with this architecture showed delayed flowering  
686 (VANDEMARK *et al.* 2014). Our strongest association for days to flowering was near the candidate  
687 gene *KNU*. This gene is a candidate for the gene *Higher response (Hr)* (GU *et al.* 1998), which  
688 affects flowering time. A BLAST analysis of RAPD primers from previous work constrains the  
689 location of *Hr* between 1.4 and 21Mb on Pv01 (GU *et al.* 1998). *Hr* is thus a plausible candidate  
690 for the peak at 13Mb. *Hr* is known to be in LD with the common bean gene *terminal flower 1*  
691 (*PvTFL1* or *fin*) on Pv01, a major determinacy gene in common bean, (REPINSKI *et al.* 2012). Thus,  
692 this gene could plausibly have been introduced during the introduction of Type II architecture.

693 The primary disease resistance phenotype introduced into entries in the CDBN over the  
694 past 30 years was bean rust resistance. Bean rust (*Uromyces appendiculatus*) was a major  
695 disease in North America in the 20<sup>th</sup> century (ZAUMEYER 1947). Though the first rust resistant  
696 varieties were released in the 1940's (ZAUMEYER 1947), rust was primarily controlled by  
697 chemicals prior to the concerted introduction of rust resistance genes in the mid-1980s (KELLY  
698 2001). Our strongest association for rust damage score fell just upstream of the gene model  
699 *Phvul.011G193100*, which maps in the interval suggested to contain the resistance gene *Ur-3*  
700 (HURTADO-GONZALES *et al.* 2017). Initially described by BALLANTYNE (1978), *Ur-3* was the first gene  
701 aggressively used by US breeders to address bean rust in the mid-1980s (HURTADO-GONZALES *et*

702 *al.* 2017). Combining *Ur-3* and *Ur-11* provides resistance against all known rust races (PASTOR-  
703 CORRALES *et al.* 2003), and the two genes formed the basis of breeding efforts to pyramid major  
704 bean rust resistance genes that led to the release of pinto, great northern, and black bean  
705 germplasm currently used in breeding programs. The alternate allele was present in the early  
706 years of the CDBN data in the Mesoamerican race but was either absent or rare in the  
707 Durango/Jalisco race in the CDBN until 1988, when it appeared in the pinto Sierra and the great  
708 northern variety Starlight. The alternate allele was not widely distributed in the Durango/Jalisco  
709 race until the mid-1990's (Figure S3d). These results agree with the known timing of breeding  
710 for rust resistance.

711 Finally, this work allowed us to characterize the patterns of sharing of genetic effects on  
712 phenotypes in the CDBN. Selection for the common bean ideotype is known to have led to  
713 pleiotropic effects on, and associations with other traits, such as seed yield, biomass, and plant  
714 height (SOLTANI *et al.* 2016). Previous work indicated that genes responding to photoperiod have  
715 a major influence on many traits, including biomass, harvest index, days to maturity, and plant  
716 architecture traits such as the number of branches and nodes (WALLACE *et al.* 1993; GU *et al.*  
717 1994). Our associations also revealed substantial overlaps in the genomic regions affecting  
718 phenotypic variation, suggesting the presence of substantial pleiotropy or linked genes of major  
719 effect. The genomic region on Pv01 from 34 – 48 Mb has also been identified in previous QTL  
720 mapping studies as one that affects many traits, including seed yield, days to flowering, days to  
721 maturity, seed fill duration, seed weight, biomass, and pod wall ratio (TRAPP *et al.* 2015; TRAPP *et*  
722 *al.* 2016). Our mash analysis reveals two major groups of phenotypes with commonly shared  
723 SNP effects, one corresponding to plant architecture and size, and the other related disease

724 response. Very few SNPs had similar effects on both groups of traits (Figure 3c). This indicates  
725 pleiotropy or correlated effects within each group of phenotypes, and unlinked effects or  
726 antagonistic pleiotropy between these groups of phenotypes. In addition, the two groups of  
727 phenotypes that had similar genetic effects at the SNP level did not substantially overlap groups  
728 of phenotypes with highly correlated genetic values by BLUP estimation (Figure S4). Though  
729 many genomic regions affect multiple phenotypes in the CDBN, the large shared effects  
730 detected by mash do not always combine additively into the overall patterns of genetic  
731 correlation present in this dataset. However, two sets of phenotypes did have shared SNP  
732 effects and similar patterns of phenotypic correlations: lodging, seed yield, and growth, and  
733 biomass, plant height, days to flowering, and days to maturity. We suggest that these seven  
734 phenotypes were the most important when breeders selected for preferred common bean  
735 ideotypes. In contrast, many of the remaining phenotypes were related to disease damage;  
736 these phenotypes might be more affected by epistatic interactions between genomic regions,  
737 or by tradeoffs across environments.

738 Overall, METs such as the CDBN offer a remarkable opportunity to identify candidate  
739 genes underlying phenotypic variation and phenotypic plasticity and to identify how artificial  
740 selection has affected crop phenotypes through time. We note that the genomic regions found  
741 with this approach are likely to have consistent, stable phenotypic effects across a large range  
742 of environments. These genomic regions are thus likely to be generally useful to bean breeding.  
743 Detailed mapping and cloning of the causative genes in these regions will provide insight into  
744 molecular mechanisms that control these critical phenotypes important for high productivity of

745 common bean. In the future, we also believe that it would be of great value to crop breeding  
746 and genetics to archive DNA from all material used in breeding programs and MET trials.

747 Many crops, both in the U.S. and worldwide, have public trials that could be mined in a  
748 manner similar to our approach. This work will require collaborative efforts between crop  
749 breeders and bioinformaticians to digitize, clean, and analyze phenotypic data from METs and  
750 to obtain genetic material from successful and unsuccessful trial entries. Phenotypic and  
751 genetic data can be combined using genomic selection approaches, or by GWAS using models  
752 that adjust BLUPs for effects of kinship, trial location, and trial year (RIFE *et al.* 2018; SUKUMARAN  
753 *et al.* 2018). If effect estimates for genetic markers can be obtained, and some effects are  
754 strong, the patterns of significant effects across markers and phenotypes can be determined  
755 using a metaanalysis approach such as mash (URBUT *et al.* 2019). A broader effort to collectively  
756 mine such extensive phenotypic data could identify conserved genetic factors important for  
757 improved productivity for many crops in major production regions.

## 758 **Acknowledgements**

759 The authors would like to thank An Hang, John Kolar, and Shree Singh for substantial  
760 contributions over the history of the CDBN and Melody Yeh for assistance in digitizing and  
761 harmonizing the CDBN reports. USDA is an equal opportunity provider and employer. We thank  
762 the Joint Genome Institute for pre-publication access and use of the *Phaseolus vulgaris* V2.1  
763 genome and annotation. This research was partially funded by support from the National  
764 Science Foundation, Plant Genomes Research Program, Grant IOS-1612262 to AHM.

## 765 **Author contributions**

766 AHM, JMO, JWW, PEM, and TEJ conceived of the analysis. PEM, JMO, PNM, and JM  
767 provided seed for varieties in the CDBN. AHM, RL, PEM, and JS sequenced the CDBN. RL and  
768 PEM provided sequence data from the ADP and MDP. JWW compiled the phenotypic data from  
769 the annual CDBN reports. AHM conducted the analyses with input from JWW, PEM, and TEJ.  
770 AHM wrote the manuscript with contributions from all authors.

771

772 **Figures & Tables**

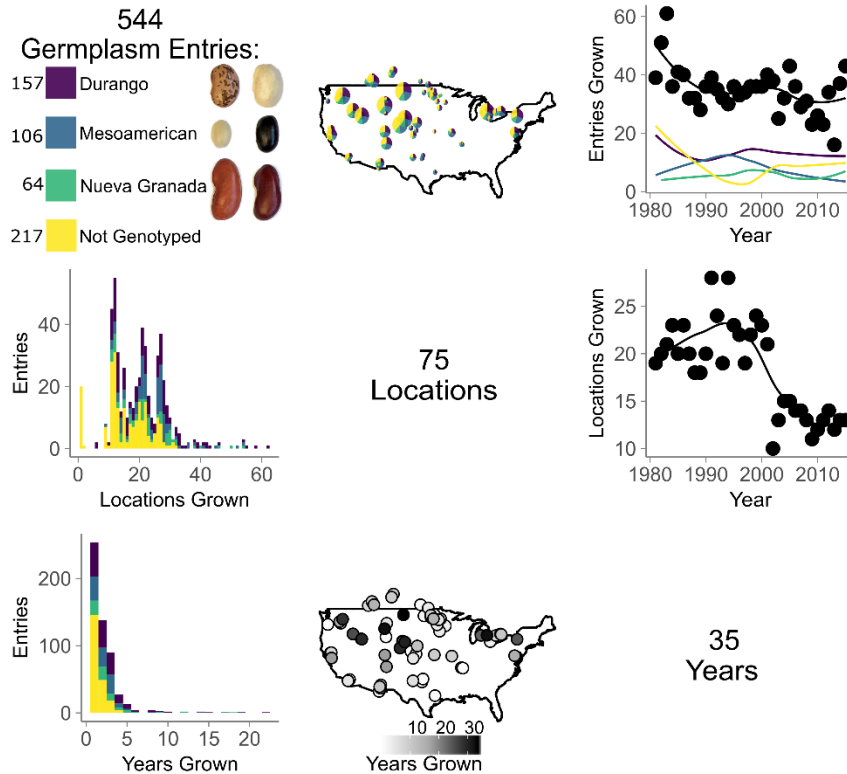

773

774 **Figure 1.** The Cooperative Dry Bean Nursery (CDBN) is an extensive multi-environment trial with  
 775 hundreds of germplasm entries for common bean (*Phaseolus vulgaris*) grown at 75 locations  
 776 over 35 years. The relationships between germplasm entries (first row and column), locations  
 777 (second row and column), and years (third row and column) used in the CDBN are shown in the  
 778 grid. Purple represents genotyped germplasm entries from the Durango race of the  
 779 Mesoamerican gene pool, blue represents genotyped entries in the Mesoamerican race of the  
 780 Mesoamerican gene pool, green represents genotyped entries in the Nueva Granada race of  
 781 the Andean gene pool, and yellow represents entries that were not genotyped. Beans of the  
 782 two most commonly genotyped market classes from each race are pictured to the right of the  
 783 color key, and the number of entries of each race that were genotyped is displayed to the left

784 of the color key. On the maps of CDBN locations, pie chart size is scaled relative to the total  
 785 number of entries grown at that location, and circle saturation represents locations with a  
 786 greater number of years of data available.

787

788

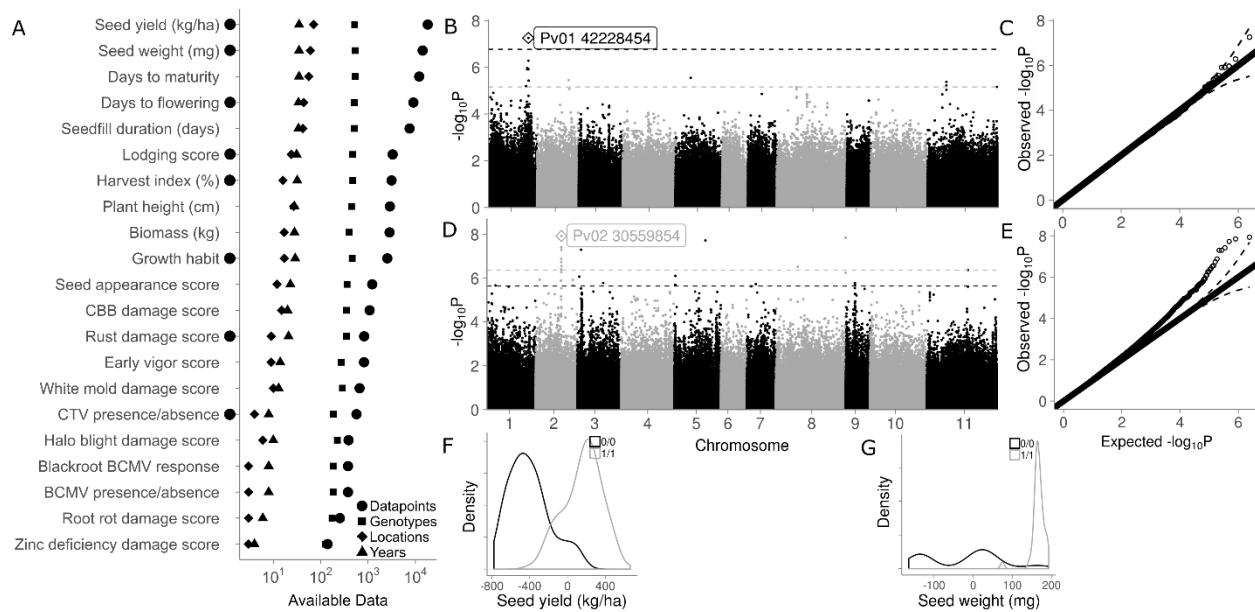

789

790 **Figure 2.** Phenotypic data available in the Cooperative Dry Bean Nursery (CDBN), and genetic

791 variation within the two of these phenotypes with the most data. A) Details of 22 phenotypes

792 present in the CDBN; best linear unbiased predictors (BLUPs) from these phenotypes were used

793 for genome-wide association. Black circles left of the y-axis indicate phenotypes with one or

794 more genetic associations that had  $p$ -values above the Benjamini-Hochberg false discovery rate.

795 B) Manhattan plot of BLUPs for seed yield (kg/ha) from the CDBN data. The dashed lines are the

796 cutoff values for peak significance. Single-nucleotide polymorphisms above the Benjamini-

797 Hochberg false discovery rate are above the black line, and those in the 0.001 percentile are

798 above the grey line. C) Quantile-quantile (Q-Q) plot of the goodness of fit of the model on seed

799 yield. D) Manhattan plot of BLUPs for seed weight (mg) from the CDBN data, as in B). E) Q-Q  
 800 plot of the goodness of fit of the model on seed weight. Distribution of the BLUPs for F) seed  
 801 yield and G) seed weight. Black represents the presence of the reference allele for the top SNP  
 802 labeled in panel B) and D), respectively, and grey represents the presence of the alternate  
 803 allele.  
 804

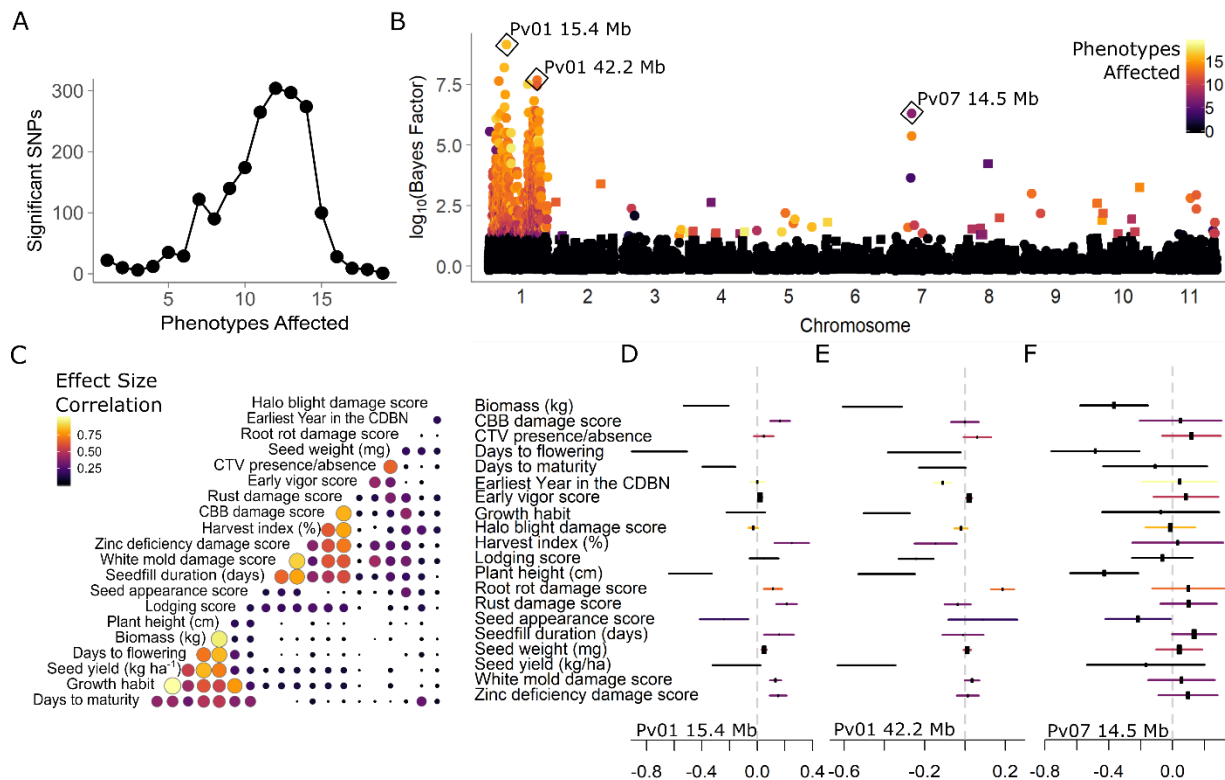

805

806 **Figure 3.** Patterns of phenotypic effects of genetic associations for 22 phenotypes from the

807 Cooperative Dry Bean Nursery (CDBN), determined using multivariate adaptive shrinkage

808 (mash). A) Single-nucleotide polymorphisms (SNPs) with significant effects on one or more of

809 the 22 phenotypes in the CDBN. B) Manhattan plot of the Bayes factor ( $\log_{10}$ ) comparing the



810 model likelihood that the SNP has significant effects to the likelihood that it has no significant  
811 effects. Bayes factors of  $> 10^2$  are considered decisive evidence in favor of the alternate model.  
812 Point color represents the number of phenotypes for which the SNP has a local false sign rate  $<$   
813 0.05. Squares represent even chromosomes, while circles represent odd chromosomes. The top  
814 associations for three regions of the genome are highlighted. C) Correlation in the sign and  
815 magnitude of significant effects in all pairwise comparisons of the 22 CDBN phenotypes. Circle  
816 size and color indicate the fraction of all significant SNPs that have the same effect sign and  
817 similar effect magnitude. D-F) Effect estimates and standard errors for 22 phenotypes for the  
818 top associations from three regions of the genome, D) *Phaseolus vulgaris* chromosome 1 (Pv01)  
819 at 15.4 Mb, E) Pv01 at 42.2 Mb, F) Pv07 at 14.5 Mb. Genomic locations are based on the  
820 *Phaseolus vulgaris* v2.1 genome annotation. Point estimates with higher certainty are indicated  
821 by larger rectangles, while standard error bars are colored by the six groups present in C.  
822

823 **Table 1.** Best linear unbiased predictor statistics, with phenotypes ordered as in Figure 2.

| Phenotype                    | $V_g$    | $V_e$    | $h^2$ | BLUP Range | Units               |
|------------------------------|----------|----------|-------|------------|---------------------|
| Seed yield (kg/ha)           | 53173    | 222409   | 0.193 | 1727       | kg ha <sup>-1</sup> |
| Seed weight (mg)             | 2340     | 1076     | 0.685 | 443        | mg                  |
| Days to maturity             | 12.3     | 18.3     | 0.402 | 17.0       | days                |
| Days to flowering            | 4.68     | 6.11     | 0.434 | 11.7       | days                |
| Seedfill duration (days)     | 5.584    | 17.812   | 0.239 | 12.7       | days                |
| Lodging score                | 0.244    | 0.466    | 0.344 | 2.97       | 1-5 scale           |
| Harvest index (%)            | 13.5     | 31.5     | 0.299 | 20.1       | %                   |
| Plant height (cm)            | 13.8     | 42.5     | 0.245 | 18.1       | cm                  |
| Biomass                      | 2.46E+05 | 6.72E+05 | 0.268 | 2990       | kg                  |
| Growth habit                 | 0.160    | 0.154    | 0.509 | 2.19       | 1-3 scale           |
| Seed appearance score        | 0.017    | 0.241    | 0.067 | 0.346      | 1-3 scale           |
| CBB damage score             | 0.282    | 1.127    | 0.200 | 2.32       | 1-9 scale           |
| Rust damage score            | 3.201    | 1.957    | 0.621 | 7.35       | 1-9 scale           |
| Early vigor score            | 0.064    | 0.747    | 0.078 | 0.957      | 1-9 scale           |
| White mold damage score      | 0.143    | 0.631    | 0.185 | 2.60       | 1-5 scale           |
| CTV presence/absence         | 0.025    | 0.132    | 0.157 | 0.432      | 0-1 scale           |
| Halo blight damage score     | 0.176    | 0.708    | 0.199 | 1.12       | 1-5 scale           |
| BCMV blackroot response      | 0.049    | 0.086    | 0.363 | 0.843      | 0-1 scale           |
| BCMV presence/absence        | 0.016    | 0.097    | 0.145 | 0.428      | 0-1 scale           |
| Root rot damage score        | 0.455    | 3.193    | 0.125 | 2.25       | 1-9 scale           |
| Zinc deficiency damage score | 3.831    | 1.395    | 0.733 | 8.96       | 1-9 scale           |

824  $V_g$  is the REML estimate of the genetic variance from rrBLUP.  $V_e$  is the REML estimate of the  
825 error variance.  $h^2$  is narrow sense heritability, defined as  $V_g / (V_g + V_e)$ .

826

827 **Table 2.** Major associations in genome-wide associations (GWAS) from phenotypes from the  
828 Cooperative Dry Bean Nursery (CDBN) and from previously published GWAS. FDR indicates  
829 associations from this paper which were above the Benjamini-Hochberg false discovery rate  
830 correction. Colors indicate associations in more than one published GWAS: blue indicates

831 associations within 20kb, with the same candidate gene, and grey indicates associations within  
 832 200kb.

|     | Trait                    | Study                          | Chr | Position in v2.0 | Candidate gene          |
|-----|--------------------------|--------------------------------|-----|------------------|-------------------------|
|     | Plant height (cm)        | MacQueen <i>et al.</i> , XXXX  | 1   | 6.13             | <i>Phvul.001G054800</i> |
| FDR | Growth habit             | MacQueen <i>et al.</i> , XXXX  | 1   | 6.28             | <i>Phvul.001G055600</i> |
|     | Biomass (kg)             | MacQueen <i>et al.</i> , XXXX  | 1   | 6.49             | <i>Phvul.001G057100</i> |
|     | Lodging score            | Resende <i>et al.</i> , 2018   | 1   | 13.76            | <i>Phvul.001G087900</i> |
|     | Growth habit             | Resende <i>et al.</i> , 2018   | 1   | 13.76            | <i>Phvul.001G087900</i> |
|     | Days to flowering        | Moghaddam <i>et al.</i> , 2016 | 1   | 13.76            | <i>Phvul.001G087900</i> |
| FDR | Days to flowering        | MacQueen <i>et al.</i> , XXXX  | 1   | 13.45 - 15.36    | <i>Phvul.001G087900</i> |
|     | Root rot damage          | Oladzad <i>et al.</i> , 2019b  | 1   | 23.92            |                         |
|     | Days to flower           | Oladzad <i>et al.</i> , 2019a  | 1   | 27.68            |                         |
|     | Root rot damage          | Oladzad <i>et al.</i> , 2019b  | 1   | 33.03            |                         |
|     | Halo blight damage score | MacQueen <i>et al.</i> , XXXX  | 1   | 36.72            | <i>Phvul.001G132516</i> |
|     | Root rot damage          | Oladzad <i>et al.</i> , 2019b  | 1   | 37.20            |                         |
|     | Plant height (cm)        | MacQueen <i>et al.</i> , XXXX  | 1   | 38.74            | <i>Phvul.001G143800</i> |
|     | Root rot damage          | Oladzad <i>et al.</i> , 2019b  | 1   | 40.20            |                         |
| FDR | Growth habit             | MacQueen <i>et al.</i> , XXXX  | 1   | 42.17            | <i>Phvul.001G167200</i> |
| FDR | Seed yield               | MacQueen <i>et al.</i> , XXXX  | 1   | 42.23            | <i>Phvul.001G167200</i> |
|     | Growth habit             | Moghaddam <i>et al.</i> , 2016 | 1   | 42.23            | <i>Phvul.001G167200</i> |
|     | Biomass (kg)             | MacQueen <i>et al.</i> , XXXX  | 1   | 42.27            | <i>Phvul.001G167200</i> |
|     | Growth habit             | Cichy <i>et al.</i> , 2015     | 1   | 44.80            | <i>Phvul.001G189200</i> |
|     | Growth habit             | Moghaddam <i>et al.</i> , 2016 | 1   | 44.80            | <i>Phvul.001G192200</i> |
|     | Days to                  | Nascimento <i>et al.</i> ,     | 1   | 47.07            | <i>Phvul.001G214500</i> |

|     |                                   |                               |   |               |                         |
|-----|-----------------------------------|-------------------------------|---|---------------|-------------------------|
|     | flowering                         | 2018                          |   |               |                         |
|     | Days to flower                    | Raggi <i>et al.</i> , 2019    | 1 | 48.86         |                         |
|     | Days to flower                    | Raggi <i>et al.</i> , 2019    | 1 | 49.65         |                         |
|     | Halo blight damage score          | MacQueen <i>et al.</i> , XXXX | 2 | 16.17         | <i>Phvul.002G091900</i> |
| FDR | Seed weight                       | MacQueen <i>et al.</i> , XXXX | 2 | 30.38         | <i>Phvul.002G150600</i> |
|     | Days to flower                    | Oladzad <i>et al.</i> , 2019a | 2 | 38.07         |                         |
|     | Halo blight damage score          | Tock <i>et al.</i> , 2017     | 2 | 49.08         | <i>Phvul.002G326200</i> |
| FDR | Harvest index (%)                 | MacQueen <i>et al.</i> , XXXX | 3 | 2.16          | <i>Phvul.003G023000</i> |
| FDR | Seed weight                       | MacQueen <i>et al.</i> , XXXX | 3 | 4.40          | <i>Phvul.003G039900</i> |
|     | days to maturity                  | MacQueen <i>et al.</i> , XXXX | 3 | 15.75         |                         |
|     | Days to maturity                  | MacQueen <i>et al.</i> , XXXX | 3 | 32.04         | <i>Phvul.003G128400</i> |
|     | Harvest index (%)                 | MacQueen <i>et al.</i> , XXXX | 3 | 36.82         | <i>Phvul.003G153100</i> |
|     | days to maturity                  | MacQueen <i>et al.</i> , XXXX | 3 | 36.83         | <i>Phvul.003G153100</i> |
|     | Seed yield                        | Kamfwa <i>et al.</i> , 2015   | 3 | 37.60         | <i>Phvul.001G136600</i> |
|     | Days to flower                    | Oladzad <i>et al.</i> , 2019a | 3 | 40.27         |                         |
|     | Days to flower                    | Oladzad <i>et al.</i> , 2019a | 3 | 41.09         |                         |
|     | Harvest index (%)                 | Kamfwa <i>et al.</i> , 2015   | 3 | 46.70         | <i>Phvul.003G233400</i> |
|     | Harvest index (%)                 | Kamfwa <i>et al.</i> , 2015   | 3 | 47.17         | <i>Phvul.003G237900</i> |
|     | Days to flower                    | Oladzad <i>et al.</i> , 2019a | 3 | 47.35         |                         |
|     | Seed yield                        | Resende <i>et al.</i> , 2018  | 3 | 49.28 - 50.33 | <i>Phvul.003G253700</i> |
|     | days to flower & days to maturity | Oladzad <i>et al.</i> , 2019a | 3 | 51.48         |                         |

|     |                                   |                                |   |              |                  |
|-----|-----------------------------------|--------------------------------|---|--------------|------------------|
|     | days to flower & days to maturity | Oladzad <i>et al.</i> , 2019a  | 3 | 52.32        |                  |
|     | days to flower & days to maturity | Oladzad <i>et al.</i> , 2019a  | 3 | 52.6         |                  |
|     | Halo blight damage score          | Tock <i>et al.</i> , 2017      | 4 | 0.55 - 1.899 | Phvul.004G007600 |
|     | Days to maturity                  | Moghaddam <i>et al.</i> , 2016 | 4 | 1.94         | Phvul.004G011400 |
| FDR | Lodging score                     | MacQueen <i>et al.</i> , XXXX  | 4 | 2.87         | Phvul.004G025600 |
|     | Growth habit - indeterminate      | Moghaddam <i>et al.</i> , 2016 | 4 | 3.20         | Phvul.004G027800 |
|     | Halo blight damage score          | MacQueen <i>et al.</i> , XXXX  | 4 | 6.79         | Phvul.004G051500 |
|     | Days to flower                    | Raggi <i>et al.</i> , 2019     | 4 | 16.37        |                  |
|     | Days to flower                    | Raggi <i>et al.</i> , 2019     | 4 | 36.88        |                  |
|     | Halo blight damage score          | Tock <i>et al.</i> , 2017      | 4 | 46.20        | Phvul.004G158000 |
|     | days to flower & days to maturity | Oladzad <i>et al.</i> , 2019a  | 4 | 46.33        |                  |
|     | days to flower & days to maturity | Oladzad <i>et al.</i> , 2019a  | 4 | 47.06        |                  |
|     | Halo blight damage score          | MacQueen <i>et al.</i> , XXXX  | 5 | 13.25        | Phvul.005G074200 |
|     | Halo blight damage score          | Tock <i>et al.</i> , 2017      | 5 | 39.00        | Phvul.005G162500 |
|     | Root rot damage                   | Oladzad <i>et al.</i> , 2019b  | 6 | 0.57         |                  |
|     | Root rot damage                   | Oladzad <i>et al.</i> , 2019b  | 6 | 5.75         |                  |
|     | Root rot damage                   | Oladzad <i>et al.</i> , 2019b  | 6 | 6.89         |                  |

|     |                              |                                |   |               |                         |
|-----|------------------------------|--------------------------------|---|---------------|-------------------------|
|     | Root rot damage              | Oladzad <i>et al.</i> , 2019b  | 6 | 8.16          | <i>Phvul.006G017211</i> |
|     | Root rot damage              | Oladzad <i>et al.</i> , 2019b  | 6 | 12.20         |                         |
|     | Root rot damage              | Oladzad <i>et al.</i> , 2019b  | 6 | 17.85         |                         |
|     | Plant height (cm)            | MacQueen <i>et al.</i> , XXXX  | 6 | 20.89         | <i>Phvul.006G098300</i> |
|     | Growth habit - indeterminate | Moghaddam <i>et al.</i> , 2016 | 6 | 29.92         | <i>Phvul.006G203400</i> |
|     | Days to flower               | Raggi <i>et al.</i> , 2019     | 6 | 31.60         |                         |
|     | Days to maturity             | MacQueen <i>et al.</i> , XXXX  | 7 | 1.15          | <i>Phvul.007G017000</i> |
|     | Growth habit - indeterminate | Moghaddam <i>et al.</i> , 2016 | 7 | 34.12         | <i>Phvul.007G246700</i> |
|     | Lodging score                | Moghaddam <i>et al.</i> , 2016 | 7 | 34.20         | <i>Phvul.007G218900</i> |
| FDR | Lodging score                | MacQueen <i>et al.</i> , XXXX  | 7 | 33.60 - 34.51 | <i>Phvul.007G218900</i> |
|     | Plant height (cm)            | Moghaddam <i>et al.</i> , 2016 | 7 | 34.20         | <i>Phvul.007G218900</i> |
|     | Growth habit - indeterminate | Moghaddam <i>et al.</i> , 2016 | 7 | 34.20         | <i>Phvul.007G218900</i> |
|     | Biomass (kg)                 | MacQueen <i>et al.</i> , XXXX  | 7 | 35.74         | <i>Phvul.007G233700</i> |
|     | Seed weight                  | Moghaddam <i>et al.</i> , 2016 | 8 | 1.10          | <i>Phvul.008G013300</i> |
|     | root rot damage score        | MacQueen <i>et al.</i> , XXXX  | 8 | 1.34          |                         |
|     | Days to flower               | Raggi <i>et al.</i> , 2019     | 8 | 4.93          |                         |
|     | Biomass (kg)                 | Soltani <i>et al.</i> , 2017   | 8 | 6.86          | <i>Phvul.008G073000</i> |
|     | Biomass (kg)                 | Soltani <i>et al.</i> , 2017   | 8 | 7.60          | <i>Phvul.008G078200</i> |
|     | Root rot damage              | Oladzad <i>et al.</i> , 2019b  | 8 | 15.26         |                         |
|     | Root rot                     | Oladzad <i>et al.</i> , 2019b  | 8 | 17.72         |                         |

|     |                          |                                 |    |       |                  |
|-----|--------------------------|---------------------------------|----|-------|------------------|
|     | damage                   |                                 |    |       |                  |
|     | days to flower           |                                 |    |       |                  |
|     | & days to maturity       | Oladzad <i>et al.</i> , 2019a   | 8  | 24.95 |                  |
|     | Days to flower           | Raggi <i>et al.</i> , 2019      | 8  | 26.40 |                  |
|     | Halo blight damage score | Tock <i>et al.</i> , 2017       | 8  | 61.34 | Phvul.008G268700 |
|     | root rot damage score    | MacQueen <i>et al.</i> , XXXX   | 8  | 61.98 | Phvul.008G277352 |
|     | Halo blight damage score | MacQueen <i>et al.</i> , XXXX   | 9  | 5.42  | Phvul.009G022400 |
|     | days to maturity         | MacQueen <i>et al.</i> , XXXX   | 9  | 5.85  |                  |
|     | Seed yield               | Kamfwa <i>et al.</i> , 2015     | 9  | 10.00 | Phvul.009G051600 |
|     | Plant height (cm)        | MacQueen <i>et al.</i> , XXXX   | 9  | 27.98 | Phvul.009G185100 |
| FDR | Growth habit             | MacQueen <i>et al.</i> , XXXX   | 9  | 30.93 | Phvul.009G204100 |
|     | Biomass (kg)             | Soltani <i>et al.</i> , 2017    | 10 | 0.60  | Phvul.010G003600 |
|     | Seed weight              | Moghaddam <i>et al.</i> , 2016  | 10 | 2.60  | Phvul.010G017600 |
|     | Root rot damage          | Oladzad <i>et al.</i> , 2019b   | 10 | 16.40 |                  |
|     | Root rot damage          | Oladzad <i>et al.</i> , 2019b   | 10 | 19.51 |                  |
|     | Root rot damage          | Oladzad <i>et al.</i> , 2019b   | 10 | 25.44 |                  |
|     | Root rot damage          | Oladzad <i>et al.</i> , 2019b   | 10 | 29.88 |                  |
|     | Biomass (kg)             | Soltani <i>et al.</i> , 2017    | 10 | 36.45 | Phvul.010G099100 |
|     | Halo blight damage score | MacQueen <i>et al.</i> , XXXX   | 10 | 41.52 | Phvul.010G133101 |
|     | Days to flowering        | Nascimento <i>et al.</i> , 2018 | 10 | 42.50 | Phvul.010G142900 |
| FDR | Growth habit             | MacQueen <i>et al.</i> , XXXX   | 10 | 42.79 | Phvul.010G146500 |
|     | Biomass (kg)             | Soltani <i>et al.</i> , 2017    | 11 | 1.59  | Phvul.011G020500 |
|     | Days to flower           | Oladzad <i>et al.</i> , 2019a   | 11 | 4.02  |                  |

|     |                              |                                |    |       |                         |
|-----|------------------------------|--------------------------------|----|-------|-------------------------|
|     | Days to maturity             | Moghaddam <i>et al.</i> , 2016 | 11 | 4.46  | <i>Phvul.011G050300</i> |
|     | Days to flower               | Oladzad <i>et al.</i> , 2019a  | 11 | 10.66 |                         |
|     | days to maturity             | MacQueen <i>et al.</i> , XXXX  | 11 | 14.8  |                         |
|     | Root rot damage              | Oladzad <i>et al.</i> , 2019b  | 11 | 26.41 |                         |
|     | Days to flower               | Oladzad <i>et al.</i> , 2019a  | 11 | 27.27 |                         |
|     | Days to flower               | Oladzad <i>et al.</i> , 2019a  | 11 | 36.22 |                         |
|     | Root rot damage              | Oladzad <i>et al.</i> , 2019b  | 11 | 41.36 |                         |
|     | Days to maturity             | Moghaddam <i>et al.</i> , 2016 | 11 | 45.09 | <i>Phvul.011G158300</i> |
|     | Days to flower               | Oladzad <i>et al.</i> , 2019a  | 11 | 45.29 |                         |
|     | Growth habit - indeterminate | Moghaddam <i>et al.</i> , 2016 | 11 | 46.75 | <i>Phvul.011G164800</i> |
|     | Days to flower               | Oladzad <i>et al.</i> , 2019a  | 11 | 47.3  |                         |
|     | Root rot damage              | Oladzad <i>et al.</i> , 2019b  | 11 | 50.59 |                         |
| FDR | Rust                         | MacQueen <i>et al.</i> , XXXX  | 11 | 50.67 | <i>Phvul.011G193100</i> |
|     | Rust                         | Phil McClean                   | 11 | 50.67 | <i>Phvul.011G193100</i> |
|     | Biomass (kg)                 | Soltani <i>et al.</i> , 2017   | 11 | 52.55 | <i>Phvul.011G207500</i> |

833

834



835 **References**

- 836 Adams, M. W., 1982 Plant architecture and yield breeding in *Phaseolus vulgaris* L. Iowa State J.  
837 Res 56: 225-254.
- 838 Annicchiarico, P., 2002 *Genotype x Environment Interactions - Challenges and Opportunities for*  
839 *Plant Breeding and Cultivar Recommendations*. FOOD AND AGRICULTURE  
840 ORGANIZATION OF THE UNITED NATIONS.
- 841 Atwell, S., Y. S. Huang, B. J. Vilhjalmsson, G. Willems, M. Horton *et al.*, 2010 Genome-wide  
842 association study of 107 phenotypes in *Arabidopsis thaliana* inbred lines. Nature 465:  
843 627-631.
- 844 Ballantyne, B., 1978 The genetic bases of resistance to rust, caused by *Uromyces*  
845 *appendiculatus* in beans (*Phaseolus vulgaris*), pp. University of Sydney, Australia.
- 846 Bowman, D. T., 1998 Using Crop Performance Data to Select Hybrids and Varieties. Journal of  
847 Production Agriculture 11: 256-259.
- 848 Cernac, A., C. Lincoln, D. Lammer and M. Estelle, 1997 The SAR1 gene of *Arabidopsis* acts  
849 downstream of the AXR1 gene in auxin response. Development 124: 1583-1591.
- 850 Cichy, K. A., T. G. Porch, J. S. Beaver, P. Cregan, D. Fourie *et al.*, 2015 A Diversity Panel for  
851 Andean Bean Improvement. Crop Science 55: 2149.
- 852 Dash, S., J. D. Campbell, E. K. Cannon, A. M. Cleary, W. Huang *et al.*, 2016 Legume information  
853 system (LegumeInfo.org): a key component of a set of federated data resources for the  
854 legume family. Nucleic Acids Res 44: D1181-1188.

- 855 de Lucas, M., L. Pu, G. Turco, A. Gaudinier, A. K. Morao *et al.*, 2016 Transcriptional Regulation of  
856 Arabidopsis Polycomb Repressive Complex 2 Coordinates Cell-Type Proliferation and  
857 Differentiation. *The Plant Cell* 28: 2616-2631.
- 858 Desai, M., P. Rangarajan, J. L. Donahue, S. P. Williams, E. S. Land *et al.*, 2014 Two inositol  
859 hexakisphosphate kinases drive inositol pyrophosphate synthesis in plants. *The Plant*  
860 *Journal* 80: 642-653.
- 861 Donald, C. t., 1968 The breeding of crop ideotypes. *Euphytica* 17: 385-403.
- 862 Duitama, J., J. C. Quintero, D. F. Cruz, C. Quintero, G. Hubmann *et al.*, 2014 An integrated  
863 framework for discovery and genotyping of genomic variants from high-throughput  
864 sequencing experiments. *Nucleic Acids Research* 42: e44-e44.
- 865 Eckert, F., H. Kandel, B. Johnson, G. Rojas-Cifuentes, C. Deplazes *et al.*, 2011 Seed Yield and Loss  
866 of Dry Bean Cultivars under Conventional and Direct Harvest. *Agronomy Journal* 103:  
867 129.
- 868 FAOSTAT, 2015 Food and Agriculture Organization of the United Nations, pp.,  
869 <http://faostat3.fao.org/>
- 870 Graybosch, R. A., and C. J. Peterson, 2010 Genetic Improvement in Winter Wheat Yields in the  
871 Great Plains of North America, 1959–2008. *Crop Science* 50: 1882.
- 872 Gu, W., J. Zhu, D. H. Wallace, S. P. Singh and N. F. Weeden, 1998 Analysis of genes controlling  
873 photoperiod sensitivity in common bean using DNA markers. *Euphytica* 102: 125-132.
- 874 Gu, W. K., N. F. Weeden, J. Q. Zhu and D. H. Wallace, 1994 Identification of a DNA marker for  
875 Hr, a gene that interacts with Ppd to confer extreme photoperiod sensitivity in common

- 876 bean. Reports of Bean Improvement Cooperative and National Dry Bean Council  
877 Research Conference 37: 125-126.
- 878 Hamblin, M. T., T. J. Close, P. R. Bhat, S. Chao, J. G. Kling *et al.*, 2010 Population Structure and  
879 Linkage Disequilibrium in U.S. Barley Germplasm: Implications for Association Mapping.  
880 Crop Science 50: 556-566.
- 881 Hancock, A. M., B. Brachi, N. Faure, M. W. Horton, L. B. Jarymowycz *et al.*, 2011 Adaptation to  
882 climate across the *Arabidopsis thaliana* genome. Science 334: 83-86.
- 883 Hedges, L. V., and I. Olkin, 1985 CHAPTER 5 - Estimation of a Single Effect Size: Parametric and  
884 Nonparametric Methods, pp. 75-106 in *Statistical Methods for Meta-Analysis*, edited by  
885 L. V. Hedges and I. Olkin. Academic Press, San Diego.
- 886 Huang, H.-R., P.-C. Yan, M. Lascoux and X.-J. Ge, 2012 Flowering time and transcriptome  
887 variation in *Capsella bursa-pastoris* (Brassicaceae). New Phytologist 194: 676-689.
- 888 Hurtado-Gonzales, O. P., G. Valentini, T. A. S. Gilio, A. M. Martins, Q. Song *et al.*, 2017 Fine  
889 Mapping of *Ur-3*, a Historically Important Rust Resistance Locus in Common Bean. G3:  
890 Genes|Genomes|Genetics 7: 557-569.
- 891 Jing, Y., and R. Lin, 2015 The VQ Motif-Containing Protein Family of Plant-Specific  
892 Transcriptional Regulators. Plant physiology 169: 371-378.
- 893 Joshi, N., and J. Fass, 2011 Sickle: A sliding-window, adaptive, quality-based trimming tool for  
894 FastQ files, pp.
- 895 Kamfwa, K., K. A. Cichy and J. D. Kelly, 2015a Genome-wide association analysis of symbiotic  
896 nitrogen fixation in common bean. Theor Appl Genet 128: 1999-2017.

- 897 Kamfwa, K., K. A. Cichy and J. D. Kelly, 2015b Genome-Wide Association Study of Agronomic  
898 Traits in Common Bean. *The Plant Genome* 8: 0.
- 899 Kass, R. E., and A. E. Raftery, 1995 Bayes Factors. *Journal of the American Statistical Association*  
900 90: 773-795.
- 901 Kelly, J. D., 2001 Remaking bean plant architecture for efficient production, pp. 109-143 in  
902 *Advances in Agronomy*. Academic Press.
- 903 Kirby, A., H. M. Kang, C. M. Wade, C. Cotsapas, E. Kostem *et al.*, 2010 Fine mapping in 94 inbred  
904 mouse strains using a high-density haplotype resource. *Genetics* 185: 1081-1095.
- 905 Kwak, M., O. Toro, D. G. Debouck and P. Gepts, 2012 Multiple origins of the determinate  
906 growth habit in domesticated common bean (*Phaseolus vulgaris*). *Ann Bot* 110: 1573-  
907 1580.
- 908 Lex, A., N. Gehlenborg, H. Strobel, R. Vuilleumot and H. Pfister, 2014 UpSet: Visualization of  
909 Intersecting Sets. *IEEE transactions on visualization and computer graphics* 20: 1983-  
910 1992.
- 911 Li, H., and R. Durbin, 2010 Fast and accurate long-read alignment with Burrows-Wheeler  
912 transform. *Bioinformatics* 26: 589-595.
- 913 Li, X., S. Redline, X. Zhang, S. Williams and X. Zhu, 2017 Height associated variants demonstrate  
914 assortative mating in human populations. *Scientific reports* 7: 15689-15689.
- 915 Lin, T., G. Zhu, J. Zhang, X. Xu, Q. Yu *et al.*, 2014 Genomic analyses provide insights into the  
916 history of tomato breeding. *Nat Genet* 46: 1220-1226.
- 917 Lipka, A. E., F. Tian, Q. Wang, J. Peiffer, M. Li *et al.*, 2012 GAPIT: genome association and  
918 prediction integrated tool. *Bioinformatics* 28: 2397-2399.

- 919 Lotta, L. A., P. Gulati, F. R. Day, F. Payne, H. Ongen *et al.*, 2017 Integrative genomic analysis  
920 implicates limited peripheral adipose storage capacity in the pathogenesis of human  
921 insulin resistance. *Nat Genet* 49: 17-26.
- 922 MacArthur, J., E. Bowler, M. Cerezo, L. Gil, P. Hall *et al.*, 2017 The new NHGRI-EBI Catalog of  
923 published genome-wide association studies (GWAS Catalog). *Nucleic Acids Res* 45:  
924 D896-D901.
- 925 Mackay, T. F., S. Richards, E. A. Stone, A. Barbadilla, J. F. Ayroles *et al.*, 2012 The *Drosophila*  
926 *melanogaster* Genetic Reference Panel. *Nature* 482: 173-178.
- 927 Mamidi, S., M. Rossi, D. Annam, S. Moghaddam, R. Lee *et al.*, 2011 Investigation of the  
928 domestication of common bean (*Phaseolus vulgaris*) using multilocus sequence data.  
929 *Functional Plant Biology* 38: 953.
- 930 Marcel, M., 2011 Cutadapt removes adapter sequences from high-throughput sequencing  
931 reads. *EMBnet.journal* 17: 10-12
- 932 McCouch, S. R., M. H. Wright, C. W. Tung, L. G. Maron, K. L. McNally *et al.*, 2016 Open access  
933 resources for genome-wide association mapping in rice. *Nat Commun* 7: 10532.
- 934 Mefford, J., and J. Witte, 2012 The Covariate's Dilemma. *PLoS Genet* 8: e1003096.
- 935 Mittl, P. R. E., and W. Schneider-Brachert, 2007 Sel1-like repeat proteins in signal transduction.  
936 *Cellular Signalling* 19: 20-31.
- 937 Moghaddam, S. M., S. Mamidi, J. M. Osorno, R. Lee, M. Brick *et al.*, 2016 Genome-Wide  
938 Association Study Identifies Candidate Loci Underlying Agronomic Traits in a Middle  
939 American Diversity Panel of Common Bean. *Plant Genome* 9.

- 940 Morris, G. P., P. Ramu, S. P. Deshpande, C. T. Hash, T. Shah *et al.*, 2013 Population genomic and  
941 genome-wide association studies of agroclimatic traits in sorghum. Proceedings of the  
942 National Academy of Sciences 110: 453-458.
- 943 Myers, J., 1988 The Cooperative Dry Bean Nursery. Reports of the Bean Improvement  
944 Cooperative 209-210.
- 945 Nascimento, M., A. C. C. Nascimento, F. F. e. Silva, L. D. Barili, N. M. d. Vale *et al.*, 2018 Quantile  
946 regression for genome-wide association study of flowering time-related traits in  
947 common bean. PLOS ONE 13: e0190303.
- 948 NPGS, 2017 The National Plant Germplasm System. NPGS. , pp., edited by U. A. R. Service. USDA  
949 Agricultural Research Service.
- 950 O'Rourke, J. A., L. P. Iniguez, F. Fu, B. Bucciarelli, S. S. Miller *et al.*, 2014 An RNA-Seq based gene  
951 expression atlas of the common bean. BMC Genomics 15: 866.
- 952 Oh, S., H. Zhang, P. Ludwig and S. van Nocker, 2004 A Mechanism Related to the Yeast  
953 Transcriptional Regulator Paf1c Is Required for Expression of the *Arabidopsis FLC/MAF*  
954 MADS Box Gene Family. The Plant Cell 16: 2940-2953.
- 955 Oladzad, A., T. Porch, J. C. Rosas, S. M. Moghaddam, J. Beaver *et al.*, 2019a Single and Multi-  
956 trait GWAS Identify Genetic Factors Associated with Production Traits in Common Bean  
957 Under Abiotic Stress Environments. G3: Genes | Genomes | Genetics 9: 1881-1892.
- 958 Oladzad, A., K. Zitnick-Anderson, S. Jain, K. Simons, J. M. Osorno *et al.*, 2019b Genotypes and  
959 Genomic Regions Associated With *Rhizoctonia solani* Resistance in Common Bean.  
960 Frontiers in Plant Science 10.

- 961 Parry, G., and M. Estelle, 2006 Auxin receptors: a new role for F-box proteins. *Current Opinion*  
962 *in Cell Biology* 18: 152-156.
- 963 Parry, G., S. Ward, A. Cernac, S. Dharmasiri and M. Estelle, 2006 The *Arabidopsis* SUPPRESSOR  
964 OF AUXIN RESISTANCE Proteins Are Nucleoporins with an Important Role in Hormone  
965 Signaling and Development. *The Plant Cell* 18: 1590-1603.
- 966 Pastor-Corrales, J., R. Steadman and J. Kelly, 2003 Common bean gene pool information  
967 provides guidance for effective deployment of disease resistance genes. *Phytopathology*  
968 93.
- 969 Payne, T., S. D. Johnson and A. M. Koltunow, 2004 *KNUCKLES (KNU)* encodes a C2H2 zinc-finger  
970 protein that regulates development of basal pattern elements of the *Arabidopsis*  
971 gynoecium. *Development* 131: 3737-3749.
- 972 Raggi, L., L. Caproni, A. Carboni and V. Negri, 2019 Genome-Wide Association Study Reveals  
973 Candidate Genes for Flowering Time Variation in Common Bean (*Phaseolus vulgaris* L.).  
974 *Frontiers in Plant Science* 10.
- 975 Repinski, S. L., M. Kwak and P. Gepts, 2012 The common bean growth habit gene PvTFL1y is a  
976 functional homolog of *Arabidopsis* TFL1. *Theoretical and Applied Genetics* 124: 1539-  
977 1547.
- 978 Rife, T., R. Graybosch and J. Poland, 2018 Genomic Analysis and Prediction within a US Public  
979 Collaborative Winter Wheat Regional Testing Nursery. *The Plant Genome* 11.
- 980 Schmutz, J., P. E. McClean, S. Mamidi, G. A. Wu, S. B. Cannon *et al.*, 2014 A reference genome  
981 for common bean and genome-wide analysis of dual domestications. *Nature Genetics*  
982 46: 707-713.

- 983 Schork, N. J., S. S. Murray, K. A. Frazer and E. J. Topol, 2009 Common vs. rare allele hypotheses  
984 for complex diseases. *Curr Opin Genet Dev* 19: 212-219.
- 985 Schröder, S., S. Mamidi, R. Lee, M. R. McKain, P. E. McClean *et al.*, 2016 Optimization of  
986 genotyping by sequencing (GBS) data in common bean (*Phaseolus vulgaris* L.). *Molecular*  
987 *Breeding* 36.
- 988 Singh, B., and R. A. Sharma, 2015 Plant terpenes: defense responses, phylogenetic analysis,  
989 regulation and clinical applications. *3 Biotech* 5: 129-151.
- 990 Singh, S., 2000 50 years of the Cooperative Dry Bean Nursery. *Reports of the Bean*  
991 *Improvement Cooperative*: 110-111.
- 992 Sivakumaran, S., F. Agakov, E. Theodoratou, James G. Prendergast, L. Zgaga *et al.*, 2011  
993 Abundant Pleiotropy in Human Complex Diseases and Traits. *The American Journal of*  
994 *Human Genetics* 89: 607-618.
- 995 Soltani, A., M. Bello, E. Mndolwa, S. Schroder, S. M. Moghaddam *et al.*, 2016 Targeted Analysis  
996 of Dry Bean Growth Habit: Interrelationship among Architectural, Phenological, and  
997 Yield Components. *Crop Science* 56: 3005.
- 998 Soltani, A., S. MafiMoghaddam, A. Oladzad-Abbasabadi, K. Walter, P. J. Kearns *et al.*, 2018  
999 Genetic Analysis of Flooding Tolerance in an Andean Diversity Panel of Dry Bean  
1000 (*Phaseolus vulgaris* L.). *Front Plant Sci* 9: 767.
- 1001 Soltani, A., S. MafiMoghaddam, K. Walter, D. Restrepo-Montoya, S. Mamidi *et al.*, 2017 Genetic  
1002 Architecture of Flooding Tolerance in the Dry Bean Middle-American Diversity Panel.  
1003 *Front Plant Sci* 8: 1183.



- 1004 Stephens, M., 2017 False discovery rates: a new deal. *Biostatistics (Oxford, England)* 18: 275-  
1005 294.
- 1006 Sukumaran, S., M. Lopes, S. Dreisigacker and M. Reynolds, 2018 Genetic analysis of multi-  
1007 environmental spring wheat trials identifies genomic regions for locus-specific trade-offs  
1008 for grain weight and grain number. *Theor Appl Genet* 131: 985-998.
- 1009 Sun, B., L.-S. Looi, S. Guo, Z. He, E.-S. Gan *et al.*, 2014 Timing Mechanism Dependent on Cell  
1010 Division Is Invoked by Polycomb Eviction in Plant Stem Cells. *Science* 343: 1248559.
- 1011 Tock, A. J., D. Fourie, P. G. Walley, E. B. Holub, A. Soler *et al.*, 2017 Genome-Wide Linkage and  
1012 Association Mapping of Halo Blight Resistance in Common Bean to Race 6 of the  
1013 Globally Important Bacterial Pathogen. *Front Plant Sci* 8: 1170.
- 1014 Togninalli, M., U. Seren, D. Meng, J. Fitz, M. Nordborg *et al.*, 2018 The AraGWAS Catalog: a  
1015 curated and standardized *Arabidopsis thaliana* GWAS catalog. *Nucleic Acids Res* 46:  
1016 D1150-D1156.
- 1017 Trapp, J. J., C. A. Urrea, P. B. Cregan and P. N. Miklas, 2015 Quantitative Trait Loci for Yield  
1018 under Multiple Stress and Drought Conditions in a Dry Bean Population. *Crop Science*  
1019 55: 1596.
- 1020 Trapp, J. J., C. A. Urrea, J. Zhou, L. R. Khot, S. Sankaran *et al.*, 2016 Selective Phenotyping Traits  
1021 Related to Multiple Stress and Drought Response in Dry Bean. *Crop Science* 56: 1460.
- 1022 Urbut, S. M., G. Wang, P. Carbonetto and M. Stephens, 2019 Flexible statistical methods for  
1023 estimating and testing effects in genomic studies with multiple conditions. *Nat Genet*  
1024 51: 187-195.

- 1025 Vandemark, G. J., M. A. Brick, J. M. Osorno, J. D. Kelly, C. A. Urrea *et al.*, 2014 Edible Grain  
1026 Legumes.
- 1027 Visscher, P. M., N. R. Wray, Q. Zhang, P. Sklar, M. I. McCarthy *et al.*, 2017 10 Years of GWAS  
1028 Discovery: Biology, Function, and Translation. *Am J Hum Genet* 101: 5-22.
- 1029 Wallace, D. H., K. S. Yourstone, P. N. Masaya and R. Zobel, 1993 *Photoperiod gene control over*  
1030 *partitioning between reproductive and vegetative growth*.
- 1031 Weller, J. L., J. K. Vander Schoor, E. C. Perez-Wright, V. Hecht, A. M. González *et al.*, 2019  
1032 Parallel origins of photoperiod adaptation following dual domestications of common  
1033 bean. *Journal of Experimental Botany* 70: 1209-1219.
- 1034 Xiao, Y., H. Liu, L. Wu, M. Warburton and J. Yan, 2017 Genome-wide Association Studies in  
1035 Maize: Praise and Stargaze. *Mol Plant* 10: 359-374.
- 1036 Zaitlen, N., S. Lindstrom, B. Pasaniuc, M. Cornelis, G. Genovese *et al.*, 2012 Informed  
1037 conditioning on clinical covariates increases power in case-control association studies.  
1038 *PLoS Genet* 8: e1003032.
- 1039 Zaumeyer, W., 1947 Control of bean diseases. *U. S. Dept. Agr. Yearbook*: 333-337
- 1040 Zhang, Z., E. Ersoz, C.-Q. Lai, R. J. Todhunter, H. K. Tiwari *et al.*, 2010 Mixed linear model  
1041 approach adapted for genome-wide association studies. *Nature Genetics* 42: 355.
- 1042 Zhou, Q.-H., D. Fu, A. Mason, Y.-J. Zeng, C. Zhao *et al.*, 2014 *In silico integration of quantitative*  
1043 *trait loci for seed yield and yield-related traits in Brassica napus*.
- 1044
- 1045

1046 **Supporting Information**

1047 Supplementary data for this manuscript is available at: <https://doi.org/10.18738/T8/KZFZ6K>.

1048

1049 **Notes.** Further details on the methods used to generate 22 phenotypes from the Cooperative

1050 Dry Bean Nursery dataset of common bean (*Phaseolus vulgaris*). Additional materials and

1051 methods concerning phenotypic data processing, greenhouse phenotypes, single nucleotide

1052 polymorphism imputation and significance and candidate gene identification criteria.

1053

1054 **Table S1** Summary of the Cooperative Dry Bean Nursery Dataset of common bean (*Phaseolus*

1055 *vulgaris*) phenotypes and the subset used in the present analysis.

1056 **Tables S2** Excel File. Location information, genotyped Cooperative Dry Bean Nursery germplasm

1057 information, and corrected phenotype medians for 22 phenotypes used for each entry for

1058 genome-wide association on common bean (*Phaseolus vulgaris*).

1059 **Table S3** Number of principle components that maximized the Bayesian Information Criterion

1060 for model selection in GAPIT, for each set of BLUPs derived from phenotypes in the Cooperative

1061 Dry Bean Nursery dataset.

1062 **Table S4** Excel File. Associations from single phenotype genome-wide association significant

1063 using a Benjamini-Hochberg false discovery rate threshold of 10%. Separate tabs of the

1064 document are associations for separate phenotypes.

1065 **Tables S5** Excel File. Associations from the multivariate shrinkage analysis significant using a  
1066 local false sign rate threshold of 5%.

1067

1068 **Fig. S1** Correlations between best linear unbiased predictors (BLUPs) for each phenotyped entry  
1069 in the Cooperative Dry Bean Nursery.

1070 **Fig. S2** Genomic associations for six additional phenotypes with associations above a Benjamini-  
1071 Hochberg false discovery rate correction.

1072 **Fig. S3** Specific effects of top associations for four phenotypes in the Cooperative Dry Bean  
1073 Nursery dataset of common bean (*Phaseolus vulgaris*).

1074 **Fig. S4** Overlap between genetic correlation and effect size correlation groups.
